# Supplementary material for: Multiple barriers to participation for people with psychosocial disability in Dehradun district, North India: a cross-sectional study
Source: PubMed Central journal article supplement — BMJ Open. 2018 Feb 27;8(2):e019443. doi: 10.1136/bmjopen-2017-019443 (PMC5855246; doi:10.1136/bmjopen-2017-019443), 2018-02-27
Supplement: bmjopen-2017-019443.draft_revisions.pdf [file bmjopen-2017-019443.draft_revisions.pdf]

# BMJ Open

BMJ Open is committed to open peer review. As part of this commitment we make the peer review history of every article we publish publicly available.

When an article is published we post the peer reviewers' comments and the authors' responses online. We also post the versions of the paper that were used during peer review. These are the versions that the peer review comments apply to.

The versions of the paper that follow are the versions that were submitted during the peer review process. They are not the versions of record or the final published versions. They should not be cited or distributed as the published version of this manuscript.

BMJ Open is an open access journal and the full, final, typeset and author-corrected version of record of the manuscript is available on our site with no access controls, subscription charges or pay-per-view fees (<http://bmjopen.bmj.com>).

If you have any questions on BMJ Open's open peer review process please email [editorial.bmjopen@bmj.com](mailto:editorial.bmjopen@bmj.com)

# BMJ Open

## Multiple barriers to participation for people with psychosocial disability in Dehradun district, North India – a cross-sectional study

|                                 |                                                                                                                                                                                                                                                                                                                                                                                     |
|---------------------------------|-------------------------------------------------------------------------------------------------------------------------------------------------------------------------------------------------------------------------------------------------------------------------------------------------------------------------------------------------------------------------------------|
| Journal:                        | <i>BMJ Open</i>                                                                                                                                                                                                                                                                                                                                                                     |
| Manuscript ID                   | bmjopen-2017-019443                                                                                                                                                                                                                                                                                                                                                                 |
| Article Type:                   | Research                                                                                                                                                                                                                                                                                                                                                                            |
| Date Submitted by the Author:   | 04-Sep-2017                                                                                                                                                                                                                                                                                                                                                                         |
| Complete List of Authors:       | Mathias, Kaaren; Emmanuel Hospital Association, Landour Community Hospital, Mussoorie<br>Pant, Hira; Public Health Foundation of India, Indian Institute of Public Health,<br>Marella, M; University of Melbourne,<br>Singh, Lawrence; AKS Hope<br>Murthy, GVS; Public Health Foundation of India<br>Grills, Nathan; The University of Melbourne, Nossal Institute of Global Health |
| <b>Primary Subject Heading</b>: | Global health                                                                                                                                                                                                                                                                                                                                                                       |
| Secondary Subject Heading:      | Epidemiology, Mental health, Public health                                                                                                                                                                                                                                                                                                                                          |
| Keywords:                       | MENTAL HEALTH, Depression & mood disorders < PSYCHIATRY, Anxiety disorders < PSYCHIATRY, EPIDEMIOLOGY                                                                                                                                                                                                                                                                               |
|                                 |                                                                                                                                                                                                                                                                                                                                                                                     |

SCHOLARONE™  
Manuscripts

1  
2  
3 **Multiple barriers to participation for people with psychosocial disability in Dehradun district,**  
4 **North India – a cross-sectional study**  
5

6  
7 **Mathias, K, Pant, H, Marella, M, Singh, L, Murthy, GVS, Grills, N**  
8

9 Corresponding author

10 Kaaren Mathias

11 Landour Community Hospital

12 Mussoorie

13 Uttarakhand

14 248179

15 INDIA

16  
17  
18 [kaaren@eha-health.org](mailto:kaaren@eha-health.org)  
19

20 Phone +91 7895 121535  
21

22 Hira Pant - Public Health Foundation of India, Indian Institute of Public Health  
23 Plot # 1, Rd Number 44, Masthan Nagar, Kavuri Hills, Madhapur, Hyderabad, Telangana  
24 500033  
25

26 Manju Marella - University of Melbourne, Nossal Institute for Global Health, 333 Exhibition  
27 St, Melbourne VIC 3004, Australia  
28

29 Lawrence Singh - Parimahal, D-55 Aman Vihar, Lane D-10, Village Chidowali, P.O. - Kandoli  
30 ,Sahastradhara Road, Dehradun, Uttarakhand 248001  
31

32  
33 GVS Murthy - Indian Institute of Public Health, Public Health Foundation of India  
34 Plot # 1, Rd Number 44, Masthan Nagar, Kavuri Hills, Madhapur, Hyderabad, Telangana  
35 500033  
36

37 Nathan Grills - - University of Melbourne, Nossal Institute for Global Health, 333 Exhibition  
38 St, Melbourne VIC 3004, Australia  
39

40  
41  
42 Text – 3206 words (excluding title page, abstract, references, figures and tables)  
43  
44  
45  
46  
47  
48  
49  
50  
51  
52  
53  
54  
55  
56  
57  
58  
59  
60

1  
2  
3 **Abstract –**  
4 **OBJECTIVES**

5  
6 This study used a population-based cross-sectional survey to describe the prevalence of psycho-  
7 social disability and unmet need for access to services in North India

8  
9 **SETTING**

10 This study was conducted in Dehradun district, Uttarakhand in 2014.

11  
12 **PARTICIPANTS**

13  
14 A population-based sample of 2441 people over the age of 18 years

15  
16 **PRIMARY OUTCOME MEASURES**

17 The Rapid Assessment of Disability (RAD) survey tool identified people with disability and used an  
18 adapted version of the Kessler scale to identify those with psycho-social disability. It additionally  
19 collected information on socio-economic variables, access to community services and barriers to  
20 participation. Prevalence of psycho-social disability and unmet needs, and descriptions of barriers to  
21 services were calculated, and multi-variable logistic regression were used to assess associations  
22 between risk factors and psycho-social disability.  
23

24  
25 **RESULTS**

26 Prevalence of psycho-social disability was 4.8 % and 75% of participants with psychological distress  
27 also reported comorbid functional impairments. Adjusted odds-ratios for depression of more than 2  
28 were found for people who were unschooled, unemployed and of moderate or poor socio-economic  
29 status. The unmet need for access to services was significantly higher in every domain for people  
30 with psycho-social disability and was more than 25% in the areas of employment, health service  
31 access and community consultation. People with psycho-social disability encountered greater  
32 barriers in each domain compared to controls.  
33  
34

35  
36 **CONCLUSIONS**

37 People who are poor, uneducated and unemployed are two to four times more likely to have  
38 psycho-social disability in Dehradun district. They face unmet needs in accessing community services  
39 and perceive negative social attitudes, lack of physical accessibility and lack of information as  
40 barriers limiting their participation. Social policy must increase access to education and reduce  
41 poverty but additionally ensure action is taken in all community services to increase information,  
42 physical accessibility and social inclusion of people with psycho-social and other forms of disability.  
43  
44

45  
46 **KEY WORDS**

47 Depression

48 Anxiety

49 Mental health

50 Epidemiology

### STRENGTHS AND LIMITATIONS

- This study uses a community-based randomly selected sample of adults to assess prevalence of psycho-social disability and barriers to participation
- This study presents one of the first assessments of barriers to community participation for people with psycho-social disability in India
- A limitation of this study is that it uses an adapted Kessler - 6 scale as screening tool to assess psycho-social disability rather than a definitive clinical assessment
- The cross-sectional design cannot indicate causation and the survey covered only one block in one district of Uttarakhand state, which may limit generalisability.

### CONTRIBUTORSHIP STATEMENT

NG, GVS and MM conceived of the study and the overall design, HP and KM performed data analysis, and KM wrote the first and subsequent drafts. LS supported data collection and NG and MM supported study design, analysis and overview of the whole paper. All authors provided input into drafts of the paper.

### FUNDING STATEMENT

CBM (an international development organisation with a focus on disability) funded this research. As they are not a research council they do not use grant numbers.

## INTRODUCTION

Mental illness was the leading cause of years lived with disability in the 2010 Global Burden of Disease study, with the majority of people affected living in low and middle income countries (LMIC). Psycho-social disability is a term increasingly preferred by people who use mental health services, and includes related negative social impacts of psychological or social disability including discrimination, and exclusion. We use this term to support our stance that many barriers are related to the way society limits the personal, social, political and economic power of people with disability<sup>1</sup>.

To allow people with disabilities to fully enjoy all human rights and fundamental freedoms, the United Nations Convention on the Rights of Persons with Disability (UNCRPD) acknowledges “the importance of accessibility to the physical, social, economic and cultural environment, to health and education and to information and communication”<sup>3</sup>. Yet this accessibility is significantly limited for many people with disabilities due to lack of regulation of law and policies, social attitudes, lack of financial resources and a lack of evidence-based research to quantify and implement solutions.

While many people with psycho-social disability are physically able to access services, barriers include real and perceived negative attitudes, limited motivation and self-belief and limited social role functioning. Policy guidance on social inclusion and community participation in the sphere of global mental health has been broad, with few specifics on what to measure and how to operationalise or measure participation by affected individuals<sup>4</sup>. In a paper describing the top 40 challenges for Global Mental health in 2011, ‘*to develop culturally informed methods to eliminate the stigma, discrimination and social exclusion of patients and families across cultural settings*’ was ranked as the second most important challenge<sup>5</sup>. To engage and respond to the real challenges for psycho-social disability, we also need to conceptualise what community participation and social inclusion ‘look like’ and generate data to understand access to services, and barriers limiting participation<sup>4</sup>.

Social inclusion has been identified as key to reducing health inequalities by increasing health-related knowledge<sup>6</sup>, improving people’s control of their health and promoting healthy behaviours<sup>7</sup>. Participation can impact directly and indirectly on health. Opportunity to participate in accessing sanitation, clean water, health and education services can directly improve health. However participation in domains of life such as community consultations, religious gatherings and disabled persons groups can also indirectly impact health through strengthened social capital, social inclusion and a sense of belonging<sup>6,8</sup>. Within a broader study of disability<sup>9</sup> the aim of this study was to describe the prevalence of psycho-social disability and its association with social determinants of health and to examine barriers to participation between people with and without psycho-social disability.

## METHODS

A cross sectional population based survey was completed in 2015 in Sahaspur block, Dehradun District in the northern Indian state of Uttarakhand using the Rapid Assessment of Disability (RAD) survey. The RAD survey was developed by the Nossal Institute for Global Health and the Centre for Eye Research Australia at The University of Melbourne, and was validated in Bangladesh and Fiji<sup>10</sup>. Greater detail on the methods used in this study are provided in another paper which examined the prevalence of all types of disability and its’ associations with health determinants and access and barriers to community services<sup>9</sup>.

### Sampling

The main study was conducted on a sample of 2441 individuals aged 18 years and over from Sahaspur block in Dehradun District. This study used a two-stage cluster random sampling where 50 clusters from 114 villages in Sahaspur block using probability proportion to size sampling. The second stage involved dividing each selected cluster into five distinct segments from which 10 people aged 18 years and above were selected from each segment to reach a total of 50 participants. Finally, for each person identified to be at risk of disability, an age (+/- 2 years) and gender matched control was recruited from an adjacent household.

### Data collection and the survey tool

After forming ten data collection teams (which included people with disability), a four-day data-collection training was conducted. The RAD provides the ability to measure disability in a population and understand the barriers to participation across a range of life domains<sup>10</sup>. The RAD included an interviewer-administered household questionnaire conducted with the household head, and an individual questionnaire. The household questionnaire assessed the household demographics, characteristics and assets.

The individual questionnaire had four sections. Demographic information including age, gender, ethnicity, religion, marital status, education level and occupation as Section One. The second section was self-assessment of functioning designed to capture functional limitations on activities related to vision, hearing, communication, mobility, gross and fine motor skills, cognition, appearance and psychological distress. This study reports on the psychological distress component, which is a modified version of the Kessler-6 (K-6) scale which assesses anxiety and depression<sup>11</sup>. The response categories for the modified K-6 used in RAD were 'none', 'some of the time', 'most of the time,' and 'all of the time'. Participants were considered to have a disability if they had difficulties "most of the time" or "all of the time" in at least two domains in the items on Kessler's scale. Section three of the RAD comprised 16 questions related to general health, relationships, respect and taking of one's self and assessed the individual's perception of well-being. Questions were reported on a four-point Likert scale ranging from 'never' to 'all of the time'. Section four assessed the level of access to different services and participation in the community under domains such as health, education, work, rehabilitation, and social and religious activities. If a participant reported more than one barrier, they were asked to report the most limiting barrier. In this paper, the most limiting barriers were reported.

### Statistical analysis

Statistical analysis used Stata 14.0<sup>12</sup>. Odds ratios, both crude and adjusted were calculated using logistic regression to assess the association between psycho-social disability, marital status, age, gender, socio-economic status, employment and schooling. Chi square and Fisher's exact tests were performed.

Any form of school attendance was classified as 'schooled' and the five age categories were used (18-24, 25-34, 35-44, 45-54 and  $\geq 55$  years). Employment categories used were employed, not employed and home maker. The reference group characteristics were: male, 18-24 years, any schooling, not married, employed and of high socioeconomic status. To calculate the asset index, principal component analysis was used (rescaled to 0-1) as a proxy for socioeconomic status [16] using categorisations of poor (between 0 and 0.4), middle class (between 0.4 and 0.8) and rich (between 0.8 and 1). Persons with psychosocial disabilities (cases) and persons without psychosocial disability

1  
2  
3 (controls) were matched for age and sex to understand barriers of service utilisation and participation  
4 and compared.  
5

6 The ethics committee at the Indian Institute of Public Health - Hyderabad and the ethics committee of the  
7 CHGN Uttarakhand Cluster granted ethics approval. Written informed consent was obtained in ways  
8 appropriate for specific disabilities and people who were not literate gave witnessed verbal consent. A  
9 plain language statement was provided to each participant.  
10

## 11 12 RESULTS

13 Out of 2500 people invited to undertake the survey, 2441 (97.6%) surveys were completed. The  
14 mean age of the participants was  $40.4 \pm 15.2$  years and 51.6% (n=1260) were male. Socio-  
15 demographic profile of the participants is presented in Table 1.  
16  
17  
18  
19  
20  
21  
22  
23  
24  
25  
26  
27  
28  
29  
30  
31  
32  
33  
34  
35  
36  
37  
38  
39  
40  
41  
42  
43  
44  
45  
46  
47  
48  
49  
50  
51  
52  
53  
54  
55  
56  
57  
58  
59  
60



**Table 1.** Profile of socio-demographic characteristics of survey participants

|               | Categories  | Total sample<br>n (%) | People without<br>psychosocial<br>disability<br>n (%) | People with<br>psychosocial<br>disability<br>n (%) |
|---------------|-------------|-----------------------|-------------------------------------------------------|----------------------------------------------------|
| <b>Total</b>  |             | 2441 (100)            | 2326 (95.2)                                           | 117 (4.8)                                          |
| <b>Age</b>    | 18-24 years | 410 (16.8)            | 397 (17.1)                                            | 13 (11.0)                                          |
|               | 25-34 years | 544 (22.3)            | 522 (22.5)                                            | 22 (18.6)                                          |
|               | 35-44 years | 586 (24.0)            | 565 (24.3)                                            | 21 (17.8)                                          |
|               | 45-54 years | 396 (16.2)            | 381 (16.4)                                            | 15 (12.7)                                          |
|               | ≥ 55 years  | 505 (20.7)            | 458 (19.7)                                            | 46 (39.8)                                          |
| <b>Gender</b> | Male        | 1,260 (51.6)          | 1,196 (51.5)                                          | 64 (54.2)                                          |
|               | Female      | 1,181 (48.4)          | 1,127 (48.5)                                          | 53 (45.8)                                          |

The prevalence of psycho-social disability according to the study definition was 4.8%. with the prevalence of other types of disability self-reported at less than 2%. Of note, the prevalence of psychological distress, with no functional impairment, was only 1.2% meaning 75% of participants with psycho-social disability also reported comorbid functional impairments. Table 2 represents a model for the prevalence of psycho-social disability, adjusting for age, gender, marital status, occupation, and education.

**Table 2:** Association between socio-demographic factors and psycho-social disability

|                              |                                   |                                                                          |                                              |                                            |                                                                                                                       |
|------------------------------|-----------------------------------|--------------------------------------------------------------------------|----------------------------------------------|--------------------------------------------|-----------------------------------------------------------------------------------------------------------------------|
|                              | <b>Schooling</b>                  | Yes                                                                      | 1,888 (77.4)                                 | 1,828 (78.7)                               | 60 (50.9)                                                                                                             |
|                              |                                   | No                                                                       | 553 (22.7)                                   | 495 (21.3)                                 | 57 (49.2)                                                                                                             |
|                              | <b>Socio-economic status</b>      | Poor                                                                     | 998 (40.9)                                   | 933 (40.2)                                 | 65 (55.1)                                                                                                             |
|                              |                                   | Middle                                                                   | 983 (40.3)                                   | 939 (40.4)                                 | 43 (37.3)                                                                                                             |
|                              |                                   | Rich                                                                     | 460 (18.8)                                   | 451 (19.4)                                 | 9 (7.6)                                                                                                               |
|                              | <b>Marital status</b>             | Single                                                                   | 409 (16.8)                                   | 389 (16.8)                                 | 20 (17.0)                                                                                                             |
|                              |                                   | Married                                                                  | 1,866 (76.4)                                 | 1,789 (77.0)                               | 76 (65.3)                                                                                                             |
|                              |                                   | Separated/Divorced/<br>Widowed                                           | 166 (6.8)                                    | 145 (6.2)                                  | 21 (17.8)                                                                                                             |
|                              | <b>Occupation</b>                 | Employed                                                                 | 1,222 (52.2)                                 | 1,175 (52.9)                               | 47 (40.2)                                                                                                             |
|                              |                                   | Homemaker                                                                | 834 (35.7)                                   | 796 (35.8)                                 | 38 (32.5)                                                                                                             |
|                              |                                   | None                                                                     | 283 (12.1)                                   | 251 (11.3)                                 | 32 (27.4)                                                                                                             |
|                              | <b>Categories</b>                 | <b>Prevalence of psychosocial disability (%)</b><br><b>Sample n=2411</b> | <b>Unadjusted OR (95%CI)</b><br><b>n=117</b> | <b>Adjusted OR (95%CI)</b><br><b>n=117</b> | <b>Psychosocial disability alone (excluding those with functional impairment)</b><br><b>Adjusted OR (95% CI) n=29</b> |
| <b>Age</b>                   | 18-24 years                       | 3.17 (1.7-5.36)                                                          | -                                            | -                                          | -                                                                                                                     |
|                              | 25-34 years                       | 4.04 (2.55-6.06)                                                         | 1.3 (0.64-2.59)                              | 2.93 (1.0-8.78)                            | 5.58 (0.52 -59.01)                                                                                                    |
|                              | 35-44 years                       | 3.58 (2.22-5.43)                                                         | 1.2 (0.56-2.29)                              | 1.62 (0.31-8.41)                           | 2.86 (0.24 - 34.73)                                                                                                   |
|                              | 45-54 years                       | 3.79 (2.14-6.17)                                                         | 1.2 (0.56-2.56)                              | 1.41 (0.23-8.63)                           | 5.77 (0.48 - 69.91)                                                                                                   |
|                              | ≥ 55 years                        | 9.11 (6.75-11.96)                                                        | 3.13 (1.66-5.91)                             | 2.2 (0.59-8.22)                            | 9.86 (0.91 - 109.63)                                                                                                  |
| <b>Gender</b>                | Female                            | 4.49 (3.38-5.82)                                                         |                                              |                                            | 2.89 (0.9 - 9.09)                                                                                                     |
|                              | Male                              | 5.07 (3.93-5.44)                                                         | 1.12 (0.77-1.62)                             | 1.27 (0.72-2.21)                           |                                                                                                                       |
| <b>Schooling</b>             | Yes                               | 3.18 (2.43-4.07)                                                         |                                              |                                            |                                                                                                                       |
|                              | No                                | 10.31 (7.90 -13.15)                                                      | 3.6 (2.44-5.21)                              | 2.3 (1.25-3.85)*                           | 2.29 (0.95 - 5.53)                                                                                                    |
| <b>Marital status</b>        | Married                           | 4.89(3.01-7.45)                                                          |                                              |                                            |                                                                                                                       |
|                              | Single                            | 4.07(3.22-5.07)                                                          | 0.81 (0.51-1.39)                             | 0.43 (0.20-0.95)*                          | 1.39 (0.33 - 5.95)                                                                                                    |
|                              | Separate/<br>widowed/<br>divorced | 12.65 (8.0-18.68)                                                        | 2.82 (1.47-5.39)                             | 3.25 (0.56-8.96)                           | 2.05 (0.38 - 11.13)                                                                                                   |
| <b>Occupation</b>            | Employed                          | 3.84 (2.89-5.08)                                                         |                                              |                                            |                                                                                                                       |
|                              | Homemaker                         | 4.43 (3.14-6.06)                                                         | 1.19 (0.77-1.85)                             | 1.07 (0.58-2.0)                            | 3.13 (1.0 - 10.81)*                                                                                                   |
|                              | Unemployed                        | 11.31 (7.86-15.58)                                                       | 3.19 (1.98-5.12)                             | 2.90 (1.60-5.26)*                          | 1.09 (0.40 - 2.95)                                                                                                    |
| <b>Socio-economic status</b> | Rich                              | 1.96(0.9-3.68)                                                           |                                              |                                            |                                                                                                                       |
|                              | Middle                            | 4.37 (3.18-5.85)                                                         | 2.35 (1.13-4.86)                             | 3.90 (1.57-9.67) *                         | 0.53 (0.12 - 2.3)                                                                                                     |
|                              | Poor                              | 6.41 (5.06-8.22)                                                         | 3.49 (1.72-7.1)                              | 4.63 (1.88-11.43)*                         | 1.13(0.27 - 4.02)                                                                                                     |

An \* denotes a statistically significant association.

Table 2 demonstrates that the odds of having psycho-social disability were significantly higher in those with no schooling (2.3 times higher than those with schooling), unemployed people (2.9 times higher than those employed) and people in both the middle and poorer levels of socio-economic status (3.9 and 4.6 times high respectively than those of rich socio-economic status). The adjusted odds for psycho-social disability without functional impairment however finds almost no statistically significant associations with these socio-demographic variables which show wide confidence

intervals. This suggests that for these study participants, co-morbid functional impairment is a significant risk factor for psycho-social disability. Table 3 explores unmet need among people with and without psycho-social disability.

**Table 3.** Unmet need in those with psychosocial disability versus those without psycho-social disability (selected domains)

| Domain                                                    | Need<br>(In the last 6 months, to<br>what extent have you<br>been able to access...?) | People<br>with PSD<br>(n = 117) | %     | People<br>without<br>PSD<br>(n = 2326) | %     | P-<br>Value |
|-----------------------------------------------------------|---------------------------------------------------------------------------------------|---------------------------------|-------|----------------------------------------|-------|-------------|
| <b>Work</b>                                               | MET NEED                                                                              | 43                              | 36.75 | 106                                    | 56.08 | <0.001      |
|                                                           | UNMET NEED                                                                            | 45                              | 38.46 | 27                                     | 14.29 |             |
|                                                           | Have not wanted to work for<br>a living                                               | 29                              | 24.79 | 56                                     | 29.63 |             |
| <b>Health<br/>Services</b>                                | MET NEED                                                                              | 66                              | 56.41 | 108                                    | 57.41 | <0.001      |
|                                                           | UNMET NEED                                                                            | 33                              | 28.21 | 25                                     | 13.23 |             |
|                                                           | Have not needed health<br>services access                                             | 18                              | 15.38 | 56                                     | 29.63 |             |
| <b>Community<br/>Consultations</b>                        | MET NEED                                                                              | 31                              | 25.5  | 95                                     | 50.26 | <0.001      |
|                                                           | UNMET NEED                                                                            | 36                              | 30.77 | 28                                     | 14.81 |             |
|                                                           | Have not wanted to<br>participate                                                     | 50                              | 42.74 | 66                                     | 34.92 |             |
| <b>Disabled<br/>Persons'<br/>Organisations<br/>(DPOs)</b> | MET NEED                                                                              | 7                               | 5.98  | 7                                      | 3.7   | <0.001      |
|                                                           | UNMET NEED                                                                            | 13                              | 11.11 | 10                                     | 5.29  |             |
|                                                           | Have not wanted to access<br>DPOs                                                     | 6                               | 5.13  | 60                                     | 31.75 |             |
|                                                           | Do not know what DPOs are                                                             | 91                              | 77.78 | 112                                    | 59.26 |             |
| <b>Social<br/>Activities</b>                              | MET NEED                                                                              | 52                              | 44.44 | 119                                    | 62.96 | <0.001      |
|                                                           | UNMET NEED                                                                            | 28                              | 23.93 | 10                                     | 5.29  |             |
|                                                           | Have not wanted to<br>participate                                                     | 37                              | 31.62 | 60                                     | 31.75 |             |
| <b>Sanitation</b>                                         | MET NEED                                                                              | 100                             | 85.47 | 187                                    | 98.94 | <0.001      |
|                                                           | UNMET NEED                                                                            | 17                              | 14.53 | 2                                      | 1.06  |             |
| <b>Safe Drinking<br/>Water</b>                            | MET NEED                                                                              | 91                              | 77.78 | 176                                    | 93.12 | <0.001      |
|                                                           | UNMET NEED                                                                            | 26                              | 22.22 | 13                                     | 6.88  |             |
| <b>Religion</b>                                           | MET NEED                                                                              | 73                              | 62.39 | 139                                    | 73.54 | 0.001       |
|                                                           | UNMET NEED                                                                            | 24                              | 20.51 | 12                                     | 6.35  |             |
|                                                           | Have not wanted to<br>participate in religion                                         | 20                              | 17.09 | 38                                     | 20.11 |             |

*NB Domains measured but not listed above also addressed assistive devices and disaster management.*

In Table 3, across different access domains the unmet need was significantly higher in every domain for people with psycho-social disability. More than a quarter of surveyed people with psycho-social disability described unmet need in relation to work (38%), health services (28%) and community consultation (30%). However, the unmet need was lower in some other domains as either the participants were not familiar

with the service (e.g. nearly 80% of respondents did not know what a DPO was) or did not want to participate. Barriers faced in different domains of daily life were assessed and are summarised in Table 4 below.

**Table 4.** Summary of barriers experienced to access community services

| Barriers                                        | People with PSD<br>(n = 117) | Average<br>% | People without PSD<br>(n = 2326) | Average<br>% | P-<br>value |
|-------------------------------------------------|------------------------------|--------------|----------------------------------|--------------|-------------|
| <b>Lack of information</b>                      | 155                          | 50.7         | 104                              | 34.0         | <0.0001     |
| <b>Difficulty getting to services from home</b> | 103                          | 33.7         | 70                               | 22.9         | 0.01        |
| <b>Physical inaccessibility</b>                 | 38                           | 12.4         | 119                              | 38.9         | <0.0001     |
| <b>Absence of reasonable accommodation</b>      | 94                           | 30.7         | 75                               | 24.5         | 0.06        |
| <b>Cost</b>                                     | 67                           | 21.9         | 55                               | 18.0         | 0.17        |
| <b>Absence of personal assistance to visit</b>  | 75                           | 24.5         | 49                               | 16.0         | 0.03        |
| <b>Not available</b>                            | 41                           | 13.4         | 56                               | 18.3         | 0.02        |
| <b>Negative attitudes</b>                       | 54                           | 17.6         | 35                               | 11.4         | 0.03        |
| <b>Family has difficulty assisting access</b>   | 38                           | 12.4         | 25                               | 8.2          | 0.02        |
| <b>Family did not want me to access</b>         | 23                           | 7.5          | 25                               | 8.2          | 0.1         |

In assessing the barriers faced by people with psycho-social disability compared to controls, they encountered greater barriers in each domain. Those related to lack of information, physical inaccessibility of services and lack of accompanying assistance accessing services and perceived negative attitudes were significantly higher. Table 5 describes the types of barriers encountered under selected access domains. We present only the domains which demonstrated a consistent difference for people with and without psycho-social disability.

**Table 5.** Barriers faced by people with psycho-social disability vs those without (selected access domains)

| Barriers                                           | People with<br>PSD<br>n = 117 | %    | People<br>without<br>PSD | %   | P-<br>value |
|----------------------------------------------------|-------------------------------|------|--------------------------|-----|-------------|
| <b>Place of work</b>                               |                               |      |                          |     |             |
| Lack of information about work                     | 12                            | 100  | 10                       | 100 | 0.10        |
| Negative attitudes towards me at work              | 11                            | 9.4  | 4                        | 2.1 | <0.001*     |
| Difficulty getting to work from home               | 17                            | 14.5 | 11                       | 5.8 | 0.01*       |
| <b>Health</b>                                      |                               |      |                          |     |             |
| Lack of information about health services          | 18                            | 15.4 | 12                       | 6.4 | 0.01*       |
| Negative attitudes towards me                      | 8                             | 6.8  | 4                        | 2.1 | 0.04*       |
| Difficulty getting to health services              | 13                            | 11.1 | 8                        | 4.2 | 0.02*       |
| <b>Community Consultations</b>                     |                               |      |                          |     |             |
| Lack of information about community consultations  | 14                            | 12.0 | 18                       | 9.5 | 0.50        |
| Negative attitudes towards me                      | 12                            | 10.3 | 2                        | 1.1 | <0.001*     |
| Difficulty getting to community meetings from home | 16                            | 13.7 | 7                        | 3.7 | <0.001*     |
| <b>Rehabilitation Services</b>                     |                               |      |                          |     |             |

|                                                                         |    |      |    |      |         |
|-------------------------------------------------------------------------|----|------|----|------|---------|
| Lack of information about rehabilitation services                       | 19 | 16.2 | 12 | 6.4  | 0.01*   |
| Negative attitudes towards you from rehab services                      | 4  | 3.4  | 0  | 0    | 0.01*   |
| Difficulty getting to rehabilitation services from home                 | 9  | 7.7  | 8  | 4.2  | 0.20    |
| <b>Safe drinking water</b>                                              |    |      |    |      |         |
| Lack of information about accessible safe water                         | 5  | 4.3  | 1  | 0.5  | 0.02*   |
| Negative attitudes towards me                                           | 6  | 5.1  | 1  | 0.5  | 0.01*   |
| Difficulty getting to safe water supplies (e.g. pumps, wells) from home | 8  | 6.8  | 3  | 1.6  | 0.02*   |
| <b>Social Activities</b>                                                |    |      |    |      |         |
| Lack of information about social activities                             | 5  | 4.3  | 3  | 1.6  | 0.15    |
| Negative attitudes towards me                                           | 5  | 4.3  | 2  | 1.1  | 0.07    |
| Difficulty getting to social venues from home                           | 13 | 11.1 | 1  | 0.5  | <0.001* |
| <b>Religion</b>                                                         |    |      |    |      |         |
| Lack of information about religious activities                          | 5  | 4.3  | 3  | 1.6  | 0.15    |
| Negative attitudes towards me                                           | 5  | 4.3  | 2  | 1.1  | 0.07    |
| Difficulty getting to religious venues from home                        | 11 | 9.4  | 3  | 1.6  | <0.001* |
| <b>Government Social Welfare Services</b>                               |    |      |    |      |         |
| Lack of information about Government social services                    | 12 | 10.3 | 6  | 3.2  | 0.01**  |
| Negative attitudes towards me                                           | 9  | 7.7  | 0  | 0.00 | <0.001* |
| Difficulty getting to social welfare services                           | 5  | 4.3  | 1  | 0.5  | 0.02*   |
| <b>Disabled Persons' Organisations</b>                                  |    |      |    |      |         |
| Lack of information about DPO services <sup>1</sup>                     | 11 | 9.4  | 3  | 1.6  | <0.001* |
| Negative attitudes towards me                                           | 1  | 0.9  | 1  | 0.5  | 0.73    |
| Difficulty getting to DPO venue from home                               | 5  | 4.3  | 3  | 1.6  | 0.152   |
| <b>Education</b>                                                        |    |      |    |      |         |
| Lack of information about education or training                         | 14 | 12.0 | 11 | 5.82 | 0.06    |
| Negative attitudes towards you                                          | 4  | 3.4  | 1  | 0.53 | 0.05    |
| Difficulty getting to education or training facilities                  | 7  | 6.0  | 2  | 1.06 | 0.01*   |

*NB Domains measured but not listed above also addressed assistive devices, disaster management and sanitation.*

Lack of information about services as a barrier to access was significantly higher for people with psycho-social disability compared to matched controls in the domains of health services, rehabilitation services, safe drinking water, Government social services and DPOs i.e. in half of the domains described. There was also a significant difference in negative attitudes perceived by people with psycho-social disability compared to controls in over half of the domains i.e. in domains of workplace, health, community consultations, rehabilitation services, safe drinking water and Government social welfare services. Surprisingly perhaps, physical accessibility was also a barrier that was significantly greater for people with psycho-social disability compared to controls (described in eight of ten domains).

## DISCUSSION

This cross-sectional survey in Sahaspur Block of Dehradun district revealed a prevalence of psycho-social disability of 4.8%, considerably higher than 0.06% prevalence rate for psychosocial disability described in the 2011 census in Uttarakhand<sup>13</sup>. The broad definition of PSD used in this survey as well as the use of non-stigmatising language is likely to have led to a higher number of people identified and may explain part of this difference in prevalence<sup>9</sup>. The prevalence identified in this study aligns with the prevalence of mental illness in India ranging from 3.4% to 8.9% described in meta-analytic studies, using a range of tools and definitions<sup>14 15</sup> and also aligns fairly closely with a recent cross-sectional population survey conducted in the district of Dehradun conducted by the

<sup>1</sup> Other aspects of the DPO domain had too few numbers for useful analysis

same lead author, that described the prevalence of depression as 6.0%, using a depression screening tool<sup>16</sup>.

This study finds risks of psycho-social disability are two to four times higher among people who have low education, unemployment and middle or low socio-economic status. Given that three-quarters of those who identified themselves as having psycho-social disability also described a co-morbid functional impairment it seems likely that functional impairment itself is a factor increasing mental distress. This significant contribution of social determinants of health was also found in the cross-sectional study of depression described above where the risk of depression was two to four times higher among people with limited schooling, poor housing, indebtedness and membership of oppressed castes<sup>16</sup>. The mechanisms by which social health determinants lead to increased psycho-social disability are likely to be complex with multiple mediating factors<sup>17</sup>. In this study we cannot determine the direction of causation however a systematic review that assessed links between common mental disorders and poverty similarly found strong relationships between education, housing, SES and common mental disorders and suggests that poverty and common mental disorders interact in a 'vicious cycle'<sup>17</sup>. Figure 1 shows a possible model for the two-way interaction of poverty and psycho-social disability and we propose that disability and other functional limitations can be located under the title of 'social causation'. We propose that "Disability/functional limitation" should be added under the title 'Social causation'.

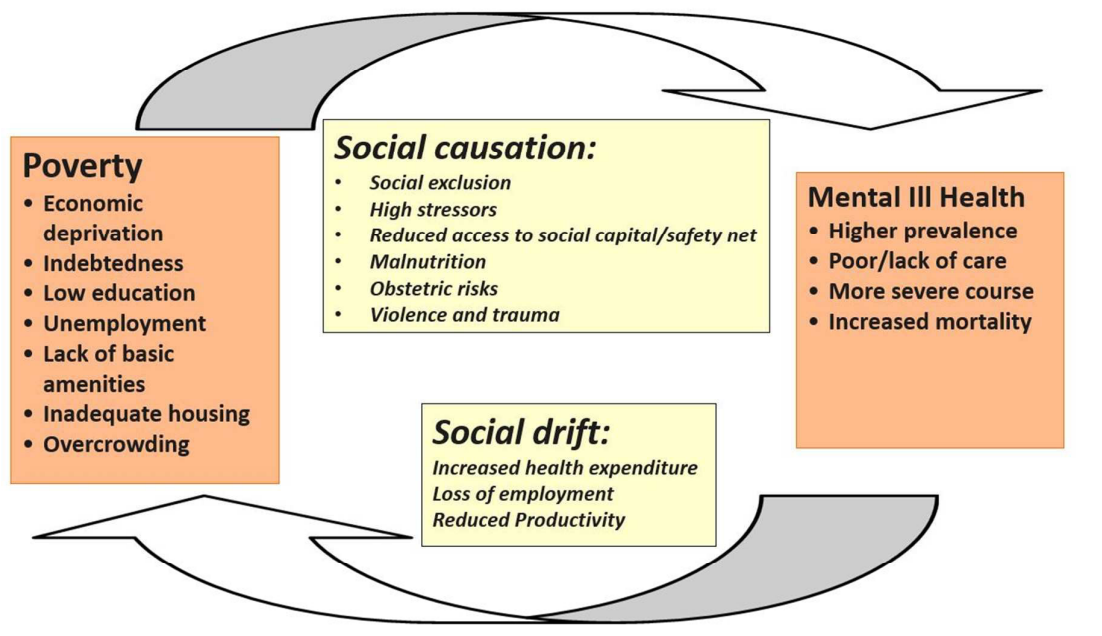

**Figure 1.** Diagram developed by Crick et al, proposing a two-way interaction between poverty and mental ill-health<sup>17</sup>

The high rate of co-morbid functional impairment reported in this study suggests a high rate of other forms of disability mixed with psycho-social disability although this cross-sectional study cannot ascertain directionality and causation (it is likely that those with functional impairment are also at higher risk of psycho-social distress). This finding is supported by this study's assessment of barriers to community services where there is a high rate of reporting of physical barriers to services and in particular, identification of the lack of physical access/ transport difficulties for people with psycho-social disability. It clearly points to the need for policies and programmes to promote mental health

1  
2  
3 knowledge and skills for all people with disabilities. Additionally, mental health policies and  
4 programmes must ensure inclusion of all people with disabilities, and seek to reduce the multiple  
5 types of barriers that limit access to care and community participation.  
6

7 This study presents one of the first accounts of barriers experienced by people with psycho-social  
8 disability for access to services in India. While the UNCRPD makes it clear that disability is influenced  
9 by both medical limitations and social prejudice, the ways that this plays out for people who suffer  
10 from psycho-social disability to limit their community participation is rarely assessed. The three key  
11 barriers to participation most frequently identified by participants with psycho-social disability in  
12 this study are related to attitudes (negative attitudes towards me), practices (lack of accommodation  
13 to support access to services) and structures ( e.g. making it difficult to get to services), which are  
14 similar to findings in a study examining participation of people with psycho-social disability in mental  
15 health policy development in South Africa <sup>2</sup>. Our study shows that people with psycho-social  
16 disability describe stigma (negative attitudes) as a significant barrier in nearly half of the domains of  
17 services described here. A number of papers have described experiences of stigma of people with  
18 psycho-social disability in India and in particular how this can negatively impact access to mental  
19 health services <sup>18-20</sup> however this study is likely the first paper to demonstrate how perceived  
20 negative attitude interact with domains of community participation. The impact of multiple  
21 marginalities such as membership of an excluded social group or having female gender and low  
22 education status adding to the disadvantage of disability has been identified as a basis for additional  
23 exclusion of those with PSD <sup>21 22</sup>.  
24

25  
26 In the multiple domains assessed in this study lack of information and physical accessibility were also  
27 frequently perceived as barriers to participation by people with psycho-social disability. The  
28 contribution of co-existing functional impairment is likely to explain the barriers related to physical  
29 accessibility and transport. While lack of access to information is high (34%) in the general  
30 community, it is even higher for people with PSD (50%). Possible reasons why lack of information  
31 appears to be a greater barrier for people with psycho-social disability could be that this group has  
32 lower literacy and fewer social contacts and networks (so less information comes their way), and  
33 that they are less motivated in seeking out information. Perhaps this group also has reduced access  
34 to mass media such as television or radio.  
35

36  
37 There are ample policies and legal structures to promote access and participation for people with  
38 disabilities in India including those with PSD. India was one of the first countries to sign the UNCRPD  
39 and recently passed the Mental Health Care Act (2017) both documents of which include  
40 components to support participation and access to services. The new Rights of Persons with  
41 disabilities act (2016) clearly includes people with mental illness, and builds on the Persons with  
42 disabilities act (1995) to push for a more disabled inclusive and accessible environment <sup>23</sup>. At the  
43 same time, we join with others to observe that access to services and participation for people with  
44 PSD remains limited, and implementation and regulation are very weak links in the chain in relation  
45 to health services and policies in India <sup>23 24</sup>.  
46

47  
48 Programmatic implementation at all levels must intentionally seek to include people with psycho-  
49 social disability. This demands attention to increasing the accessibility of community level structures  
50 such as transport and dissemination of information related to services and entitlements so that they  
51 reach people with psycho-social disability. This will require using mediums that are accessible to  
52 those who have low literacy and who have limited social networks such as loudspeaker  
53 announcements which are used widely and effectively by campaigning political parties in India. It  
54 also requires changes in attitudes at all levels in the community and among service providers. A  
55 number of steps can be taken to reduce stigma and increase social inclusion in programmes related  
56  
57



1  
2  
3 to health, education and sanitation which include increasing awareness in the community, educating  
4 service providers and increasing direct contact between people with psycho-social disability and  
5 others<sup>25</sup>.

6  
7 This study indicates that psycho-social disability is significantly associated with macro-economic  
8 health determinants that are outside the health service sector, including disability and functional  
9 impairment. Macro-policies that address education and unemployment, with a focus on those who  
10 are socially excluded, as well as policy action to reduce poverty and socio-economic deprivation may  
11 well also reduce the disease burden related to psycho-social disability<sup>26</sup>.

### 12 13 **Methodological limitations**

14  
15 The Kessler tool is a screening rather than diagnostic tool, and excluded two key risk factors for  
16 psycho-social disability: stressful life events and chronic illness. While the Kessler-6 scale has been  
17 found to have moderate- to- high discriminating ability when used by lay workers in identifying  
18 common mental disorders in India<sup>27 28</sup>, it did not screen for the whole spectrum of psychosocial  
19 disability. A limitation of the findings presented in Table 3 and 5 particularly is that the numbers are  
20 small reducing the reliability of the findings and meaning that some findings that may well have  
21 been significant with a larger sample, were not elucidated. The study is limited to adults of over 18  
22 years of age, and so cannot assess the prevalence of psycho-social disability or barriers they face,  
23 among children. As the RAD survey tool used self-reported data there may be a risk of social  
24 desirability or recall bias. As a cross-sectional survey, it cannot attribute causality to apparent risk  
25 factors. A major strength of this study is that its data are from a randomly selected population  
26 covering rural, semi-urban and urban populations in North India. Multivariable analysis ensured that  
27 potentially confounding factors were considered.

### 28 29 30 **CONCLUSIONS**

31  
32 Psycho-social disability in Dehradun district, Uttarakhand, with a prevalence of at least 4.8% is two  
33 or three times more common among people with co-morbid functional impairment who are  
34 economically deprived, who have had little education and who are unemployed. People with  
35 psycho-social disability face significant unmet needs related to community services and perceive  
36 negative social attitudes as a significant barrier limiting their participation in multiple domains. Social  
37 policy and programmes in India must take active steps to address social determinants of psycho-  
38 social disability such as increasing access to education and reduce economic deprivation.  
39 Additionally, action is needed at all levels of community programmes and services to increase social  
40 inclusion of people with psycho-social disability.

### 41 42 **ACKNOWLEDGEMENTS**

43  
44 The authors would like to thank CBM for funding support, and the Public Health Foundation of India  
45 and the Nossal Institute for Global health of the University of Melbourne who were partners in  
46 conducting this research. We acknowledge the support of field research teams under the  
47 CHGN Uttarakhand Cluster (Arukah network) for their support in data collection. The teams were  
48 AKS HOPE, OPEN, Chamba Christian hospital and EHA (Samvedna and Anugrah projects). The authors  
49 declare they have no competing interests in publishing this paper.

### 50 51 52 53 **REFERENCES**



1. Drew N, Funk M, Tang S, et al. Human rights violations of people with mental and psychosocial disabilities: an unresolved global crisis. *Lancet* 2011;378(9803):1664-75. doi: 10.1016/s0140-6736(11)61458-x [published Online First: 2011/10/20]
2. Kleintjes S, Lund C, Swartz L. Barriers to the participation of people with psychosocial disability in mental health policy development in South Africa: a qualitative study of perspectives of policy makers, professionals, religious leaders and academics. *BMC Int Health Hum Rights* 2013;13:17. doi: 10.1186/1472-698x-13-17 [published Online First: 2013/03/19]
3. United Nations. United Nations Conventions on the Rights of Persons with Disabilities. Geneva, 2008.
4. Baumgartner J, Burns J. Measuring social inclusion—a key outcome in global mental health. *Int J Epidemiol* 2014;43(2):354-64. doi: 10.1093/ije/dyt224
5. Collins P, Patel V, Joestl S. Grand challenges in Global mental health. *Nature* 2011;475:27-30.
6. Campbell C, Jovchelovitch S. Health, Community and Development : toward a social psychology of participation. *Journal of Community and Applied Social Psychology* 2007;10:255-70.
7. Bandura A. Self efficacy in changing societies. Cambridge: Cambridge University Press 1996.
8. Baum F, Palmer C. 'Opportunity structures': urban landscape, social capital and health promotion in Australia. *Health Promotion International* 2002;17(4):351-61.
9. Grills N, Singh L, Pant H, et al. Inferior access to services and greater barriers faced by people with disabilities compared to those without disability: a quantitative survey using Rapid Assessment of Disability tool. . *Disability, CBR & Inclusive Development Journal* 2017;(in press - September 2017)
10. Marella M, Busijia L, Islam A, et al. Field-testing of the rapid assessment of disability questionnaire. *BMC Public Health* 2014;14(1) doi: 10.1186/1471-2458-14-900
11. Kessler RC, Andrews G, Colpe LJ, et al. Short screening scales to monitor population prevalences and trends in non-specific psychological distress. *Psychol Med* 2002;32(06):959-76.
12. LP SC. Stata statistical software. College Station: StataCorpLP, 2015.
13. Government of India. Census 2011 2011 [Available from: <http://www.census2011.co.in/census> accessed 29 September 2014.
14. Ganguli H. Epidemiological findings on prevalence of mental disorders in India. *Indian J Psychiatry* 2000;42(1):14-20.
15. Reddy VM, Chandrashekar C. Prevalence of mental and behavioural disorders in India: A meta-analysis. *Indian J Psychiatry* 1998;40(2):149.
16. Mathias K, Goicolea I, Kermode M, et al. Cross-sectional study of depression and help-seeking in Uttarakhand, North India. *BMJ Open* 2015;5(11) doi: 10.1136/bmjopen-2015-008992
17. Lund C, Breen A, Flisher AJ, et al. Poverty and common mental disorders in low and middle income countries: A systematic review. *Soc Sci Med* 2010;71(3):517-28. doi: 10.1016/j.socscimed.2010.04.027 [published Online First: 2010/07/14]
18. Koschorke M, Padmavati R, Kumar S, et al. Experiences of stigma and discrimination of people with schizophrenia in India. *Soc Sci Med* 2014;123:149-59.
19. Raguram R, Raghu TM, Vounatsou P, et al. Schizophrenia and the cultural epidemiology of stigma in Bangalore, India. *J Nerv Ment Dis* 2004;192(11):734-44.
20. Venkatesh BT, Andrews T, Mayya SS, et al. Perception of stigma toward mental illness in South India. *Journal of family medicine and primary care* 2015;4(3):449-53. doi: 10.4103/2249-4863.161352 [published Online First: 2015/08/20]
21. Mehrotra N. Disability, Gender and Caste: Marginality, Exclusion and Opportunities in Indian Economy. *Women's Link* 2012;18(2):5-8.
22. Mehrotra N. Negotiating gender and disability in rural Haryana. *Sociological bulletin* 2006:406-26.
23. Mehrotra N. Disability rights movements in India: Politics and practice. *Economic & Political Weekly* 2011;46(6):65-72.

- 1  
2  
3 24. Addlakha R, Mandal S. Disability Law in India: Paradigm Shift or Evolving Discourse? *Economic*  
4 *and Political Weekly* 2009;62-68.  
5 25. Collins R, Wong E, Cerully J. Interventions to reduce mental health stigma and discrimination - a  
6 literature review to guide evaluation of California's mental health prevention and early  
7 intervention initiative. Los Angeles: California Mental Health Services Authority, 2012.  
8 26. Lund C, De Silva M, Plagerson S, et al. Poverty and mental disorders: breaking the cycle in low-  
9 income and middle-income countries. *Lancet* 2011;378(9801):1502-14. doi: 10.1016/s0140-  
10 6736(11)60754-x [published Online First: 2011/10/20]  
11 27. Chowdhary N, Patel V. Detection of common mental disorder and alcohol use disorders in HIV  
12 infected people: A validation study in Goa, India. *Asian J Psychiatr* 2010;3(3):130-33. doi:  
13 <http://dx.doi.org/10.1016/j.ajp.2010.08.002>  
14 28. Patel V, Araya R, Chowdhary N, et al. Detecting common mental disorders in primary care in  
15 India: a comparison of five screening questionnaires. *Psychol Med* 2008;38(2):221-8. doi:  
16 10.1017/s0033291707002334 [published Online First: 2007/12/01]  
17  
18  
19  
20  
21  
22  
23  
24  
25  
26  
27  
28  
29  
30  
31  
32  
33  
34  
35  
36  
37  
38  
39  
40  
41  
42  
43  
44  
45  
46  
47  
48  
49  
50  
51  
52  
53  
54  
55  
56  
57  
58  
59  
60

1  
2  
3  
4  
5  
6  
7  
8  
9  
10  
11  
12  
13  
14  
15  
16  
17  
18  
19  
20  
21  
22  
23  
24  
25  
26  
27  
28  
29  
30  
31  
32  
33  
34  
35  
36  
37  
38  
39  
40  
41  
42  
43  
44  
45  
46  
47  
48  
49  
50  
51  
52  
53  
54  
55  
56  
57  
58  
59  
60

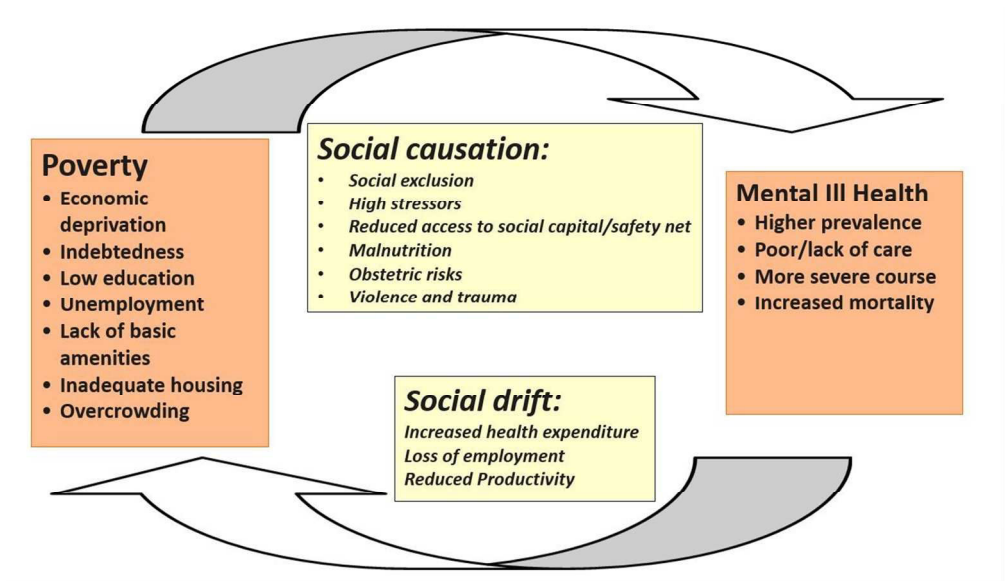

Figure 1. Diagram developed by Crick et al, proposing a two-way interaction between poverty and mental ill-health 17

230x134mm (144 x 144 DPI)

Review only

**STROBE 2007 (v4) checklist of items to be included in reports of observational studies in epidemiology\***  
**Checklist for cohort, case-control, and cross-sectional studies (combined)**

| Section/Topic             | Item # | Recommendation                                                                                                                                                                                                                                                                                                                                                                                                                                                         | Reported on page #                                    |
|---------------------------|--------|------------------------------------------------------------------------------------------------------------------------------------------------------------------------------------------------------------------------------------------------------------------------------------------------------------------------------------------------------------------------------------------------------------------------------------------------------------------------|-------------------------------------------------------|
| Title and abstract        | 1      | (a) Indicate the study's design with a commonly used term in the title or the abstract                                                                                                                                                                                                                                                                                                                                                                                 | Y                                                     |
|                           |        | (b) Provide in the abstract an informative and balanced summary of what was done and what was found                                                                                                                                                                                                                                                                                                                                                                    | Y                                                     |
| <b>Introduction</b>       |        |                                                                                                                                                                                                                                                                                                                                                                                                                                                                        |                                                       |
| Background/rationale      | 2      | Explain the scientific background and rationale for the investigation being reported                                                                                                                                                                                                                                                                                                                                                                                   | Y                                                     |
| Objectives                | 3      | State specific objectives, including any pre-specified hypotheses                                                                                                                                                                                                                                                                                                                                                                                                      | Y                                                     |
| <b>Methods</b>            |        |                                                                                                                                                                                                                                                                                                                                                                                                                                                                        |                                                       |
| Study design              | 4      | Present key elements of study design early in the paper                                                                                                                                                                                                                                                                                                                                                                                                                | Y                                                     |
| Setting                   | 5      | Describe the setting, locations, and relevant dates, including periods of recruitment, exposure, follow-up, and data collection                                                                                                                                                                                                                                                                                                                                        | Y                                                     |
| Participants              | 6      | (a) <i>Cohort study</i> —Give the eligibility criteria, and the sources and methods of selection of participants. Describe methods of follow-up<br><i>Case-control study</i> —Give the eligibility criteria, and the sources and methods of case ascertainment and control selection. Give the rationale for the choice of cases and controls<br><i>Cross-sectional study</i> —Give the eligibility criteria, and the sources and methods of selection of participants | Cross sectional – eligibility sources and methods - Y |
|                           |        | (b) <i>Cohort study</i> —For matched studies, give matching criteria and number of exposed and unexposed<br><i>Case-control study</i> —For matched studies, give matching criteria and the number of controls per case                                                                                                                                                                                                                                                 |                                                       |
| Variables                 | 7      | Clearly define all outcomes, exposures, predictors, potential confounders, and effect modifiers. Give diagnostic criteria, if applicable                                                                                                                                                                                                                                                                                                                               | Y                                                     |
| Data sources/ measurement | 8*     | For each variable of interest, give sources of data and details of methods of assessment (measurement). Describe comparability of assessment methods if there is more than one group                                                                                                                                                                                                                                                                                   | Y                                                     |
| Bias                      | 9      | Describe any efforts to address potential sources of bias                                                                                                                                                                                                                                                                                                                                                                                                              | Y                                                     |
| Study size                | 10     | Explain how the study size was arrived at                                                                                                                                                                                                                                                                                                                                                                                                                              | Y                                                     |
| Quantitative variables    | 11     | Explain how quantitative variables were handled in the analyses. If applicable, describe which groupings were chosen and why                                                                                                                                                                                                                                                                                                                                           | Y                                                     |
| Statistical methods       | 12     | (a) Describe all statistical methods, including those used to control for confounding                                                                                                                                                                                                                                                                                                                                                                                  | Y                                                     |
|                           |        | (b) Describe any methods used to examine subgroups and interactions                                                                                                                                                                                                                                                                                                                                                                                                    | Y                                                     |
|                           |        | (c) Explain how missing data were addressed                                                                                                                                                                                                                                                                                                                                                                                                                            | NA                                                    |
|                           |        | (d) <i>Cohort study</i> —If applicable, explain how loss to follow-up was addressed<br><i>Case-control study</i> —If applicable, explain how matching of cases and controls was addressed                                                                                                                                                                                                                                                                              | Y                                                     |

|                          |     |                                                                                                                                                                                                              |    |
|--------------------------|-----|--------------------------------------------------------------------------------------------------------------------------------------------------------------------------------------------------------------|----|
|                          |     | <i>Cross-sectional study</i> —If applicable, describe analytical methods taking account of sampling strategy                                                                                                 |    |
|                          |     | (e) Describe any sensitivity analyses                                                                                                                                                                        | NA |
| <b>Results</b>           |     |                                                                                                                                                                                                              |    |
| Participants             | 13* | (a) Report numbers of individuals at each stage of study—eg numbers potentially eligible, examined for eligibility, confirmed eligible, included in the study, completing follow-up, and analysed            | Y  |
|                          |     | (b) Give reasons for non-participation at each stage                                                                                                                                                         | NA |
|                          |     | (c) Consider use of a flow diagram                                                                                                                                                                           | Y  |
| Descriptive data         | 14* | (a) Give characteristics of study participants (eg demographic, clinical, social) and information on exposures and potential confounders                                                                     | Y  |
|                          |     | (b) Indicate number of participants with missing data for each variable of interest                                                                                                                          | NA |
|                          |     | (c) <i>Cohort study</i> —Summarise follow-up time (eg, average and total amount)                                                                                                                             |    |
| Outcome data             | 15* | <i>Cohort study</i> —Report numbers of outcome events or summary measures over time                                                                                                                          |    |
|                          |     | <i>Case-control study</i> —Report numbers in each exposure category, or summary measures of exposure                                                                                                         |    |
|                          |     | <i>Cross-sectional study</i> —Report numbers of outcome events or summary measures                                                                                                                           | Y  |
| Main results             | 16  | (a) Give unadjusted estimates and, if applicable, confounder-adjusted estimates and their precision (eg, 95% confidence interval). Make clear which confounders were adjusted for and why they were included | YY |
|                          |     | (b) Report category boundaries when continuous variables were categorized                                                                                                                                    | Y  |
|                          |     | (c) If relevant, consider translating estimates of relative risk into absolute risk for a meaningful time period                                                                                             | Y  |
| Other analyses           | 17  | Report other analyses done—eg analyses of subgroups and interactions, and sensitivity analyses                                                                                                               | Y  |
| <b>Discussion</b>        |     |                                                                                                                                                                                                              |    |
| Key results              | 18  | Summarise key results with reference to study objectives                                                                                                                                                     | Y  |
| Limitations              | 19  | Discuss limitations of the study, taking into account sources of potential bias or imprecision. Discuss both direction and magnitude of any potential bias                                                   | Y  |
| Interpretation           | 20  | Give a cautious overall interpretation of results considering objectives, limitations, multiplicity of analyses, results from similar studies, and other relevant evidence                                   | Y  |
| Generalisability         | 21  | Discuss the generalisability (external validity) of the study results                                                                                                                                        | Y  |
| <b>Other information</b> |     |                                                                                                                                                                                                              |    |
| Funding                  | 22  | Give the source of funding and the role of the funders for the present study and, if applicable, for the original study on which the present article is based                                                | Y  |

\*Give information separately for cases and controls in case-control studies and, if applicable, for exposed and unexposed groups in cohort and cross-sectional studies.

**Note:** An Explanation and Elaboration article discusses each checklist item and gives methodological background and published examples of transparent reporting. The STROBE checklist is best used in conjunction with this article (freely available on the Web sites of PLoS Medicine at <http://www.plosmedicine.org/>, Annals of Internal Medicine at <http://www.annals.org/>, and Epidemiology at <http://www.epidem.com/>). Information on the STROBE Initiative is available at [www.strobe-statement.org](http://www.strobe-statement.org).

# BMJ Open

## Multiple barriers to participation for people with psychosocial disability in Dehradun district, North India – a cross-sectional study

|                                 |                                                                                                                                                                                                                                                                                                                                                                                    |
|---------------------------------|------------------------------------------------------------------------------------------------------------------------------------------------------------------------------------------------------------------------------------------------------------------------------------------------------------------------------------------------------------------------------------|
| Journal:                        | <i>BMJ Open</i>                                                                                                                                                                                                                                                                                                                                                                    |
| Manuscript ID                   | bmjopen-2017-019443.R1                                                                                                                                                                                                                                                                                                                                                             |
| Article Type:                   | Research                                                                                                                                                                                                                                                                                                                                                                           |
| Date Submitted by the Author:   | 17-Nov-2017                                                                                                                                                                                                                                                                                                                                                                        |
| Complete List of Authors:       | Mathias, Kaaren; Emmanuel Hospital Association, Landour Community Hospital, Mussoorie<br>Pant, Hira; Public Health Foundation of India, Indian Institute of Public Health,<br>Marella, M; University of Melbourne<br>Singh, Lawrence; AKS Hope<br>Murthy, GVS; Public Health Foundation of India<br>Grills, Nathan; The University of Melbourne, Nossal Institute of Global Health |
| <b>Primary Subject Heading</b>: | Global health                                                                                                                                                                                                                                                                                                                                                                      |
| Secondary Subject Heading:      | Epidemiology, Mental health, Public health                                                                                                                                                                                                                                                                                                                                         |
| Keywords:                       | MENTAL HEALTH, Depression & mood disorders < PSYCHIATRY, Anxiety disorders < PSYCHIATRY, EPIDEMIOLOGY                                                                                                                                                                                                                                                                              |
|                                 |                                                                                                                                                                                                                                                                                                                                                                                    |

SCHOLARONE™  
Manuscripts

1  
2  
3 **Multiple barriers to participation for people with psychosocial disability in Dehradun district,**  
4 **North India – a cross-sectional study**  
5

6 **Mathias, K, Pant, H, Marella, M, Singh, L, Murthy, GVS, Grills, N**  
7

8 Corresponding author

9 Kaaren Mathias

10 Landour Community Hospital

11 Mussoorie

12 Uttarakhand

13 248179

14 INDIA

15 [kaaren@eha-health.org](mailto:kaaren@eha-health.org)  
16

17  
18  
19  
20  
21 Phone +91 7895 121535  
22

23 Hira Pant - Public Health Foundation of India, Indian Institute of Public Health  
24 Plot # 1, Rd Number 44, Masthan Nagar, Kavuri Hills, Madhapur, Hyderabad, Telangana 500033  
25

26  
27 Manju Marella - University of Melbourne, Nossal Institute for Global Health, 333 Exhibition St,  
28 Melbourne VIC 3004, Australia  
29

30  
31 Lawrence Singh - Parimahal, D-55 Aman Vihar, Lane D-10, Village Chidowali, P.O. - Kandoli  
32 ,Sahastradhara Road, Dehradun, Uttarakhand 248001  
33

34  
35 GVS Murthy - Indian Institute of Public Health, Public Health Foundation of India  
36 Plot # 1, Rd Number 44, Masthan Nagar, Kavuri Hills, Madhapur, Hyderabad, Telangana 500033  
37

38  
39 Nathan Grills - - University of Melbourne, Nossal Institute for Global Health, 333 Exhibition St,  
40 Melbourne VIC 3004, Australia  
41  
42  
43  
44  
45  
46  
47  
48  
49  
50  
51  
52  
53  
54  
55  
56  
57  
58  
59  
60

1  
2  
3 **Abstract –**  
4 **OBJECTIVES**

5  
6 This study used a population-based cross-sectional survey to describe the prevalence of psycho-  
7 social disability and unmet need for access to services in North India

8  
9 **SETTING**

10 This study was conducted in Dehradun district, Uttarakhand in 2014.

11  
12 **PARTICIPANTS**

13 A population-based sample of 2441 people over the age of 18 years

14  
15 **PRIMARY OUTCOME MEASURES**

16 The Rapid Assessment of Disability (RAD) survey tool identified people with disability and used an  
17 adapted version of the Kessler scale to identify those with psycho-social disability. It additionally  
18 collected information on socio-economic variables, access to community services and barriers to  
19 participation. Prevalence of psycho-social disability and unmet needs, and descriptions of barriers to  
20 services were calculated, and multi-variable logistic regression were used to assess associations  
21 between risk factors and psycho-social disability.  
22  
23  
24  
25

26 **RESULTS**

27 Prevalence of psycho-social disability was 4.8 % and 75% of participants with psychological distress  
28 also reported comorbid functional impairments. Adjusted odds-ratios for depression of more than 2  
29 were found for people who were unschooled, unemployed and of moderate or poor socio-economic  
30 status. The unmet need for access to services was significantly higher in every domain for people  
31 with psycho-social disability and was more than 25% in the areas of employment, health service  
32 access and community consultation. People with psycho-social disability encountered greater  
33 barriers in each domain compared to controls.  
34  
35  
36

37 **CONCLUSIONS**

38 People who are poor, uneducated and unemployed are two to four times more likely to have  
39 psycho-social disability in Dehradun district. They face unmet needs in accessing community services  
40 and perceive negative social attitudes, lack of physical accessibility and lack of information as  
41 barriers limiting their participation. Social policy must increase access to education and reduce  
42 poverty but additionally ensure action is taken in all community services to increase information,  
43 physical accessibility and social inclusion of people with psycho-social and other forms of disability.  
44  
45  
46

47  
48 **KEY WORDS**

49 Depression

50 Anxiety

51 Mental health

52 Epidemiology



### STRENGTHS AND LIMITATIONS

- This study uses a community-based randomly selected sample of adults to assess prevalence of psycho-social disability and barriers to participation
- This study presents one of the first assessments of barriers to community participation for people with psycho-social disability in India
- A limitation of this study is that it uses an adapted Kessler - 6 scale as screening tool to assess psycho-social disability rather than a definitive clinical assessment
- The cross-sectional design cannot indicate causation and the survey covered only one block in one district of Uttarakhand state, which may limit generalisability.

### CONTRIBUTORSHIP STATEMENT

NG, GVS and MM conceived of the study and the overall design, HP and KM performed data analysis, and KM wrote the first and subsequent drafts. LS supported data collection and NG and MM supported study design, analysis and overview of the whole paper. All authors provided input into drafts of the paper.

### FUNDING STATEMENT

CBM (an international development organisation with a focus on disability) funded this research. As they are not a research council they do not use grant numbers.

### DATA SHARING STATEMENT

There is no additional unpublished data from this study available.

## INTRODUCTION

Mental illness was the leading cause of years lived with disability in the 2010 Global Burden of Disease study, with the majority of people affected living in low and middle-income countries (LMIC). Psycho-social disability as a term refers to people who have either received a mental health diagnosis or who have identified that they experience limitations in functioning in basic psychological and social activities, and who have experienced the negative social impacts of psychological or social disability including discrimination, and exclusion<sup>1</sup>. We use this term to support our stance of a social model of disability that recognises that many barriers experienced are related to the way society limits the personal, social, political and economic power of people with disability<sup>1</sup>, can be constant or episodic and can be understood assessing activities of daily living and functional ranges<sup>3</sup>

To allow people with disabilities to fully enjoy all human, political and civil rights and fundamental freedoms, the United Nations Convention on the Rights of Persons with Disability (UNCRPD) acknowledges “the importance of accessibility to the physical, social, economic and cultural environment, to health and education and to information and communication”<sup>4</sup>. Yet in India, and beyond, at national and state levels, this accessibility is significantly limited for many people with disabilities due to lack of implementation and regulation of law and policies. Further barriers include stigma, lack of financial resources and a lack of evidence-based research to quantify and implement solutions.

While people with psycho-social disability are often physically able to access services, barriers for utilisation include real and perceived stigma, limited motivation and self-belief and limited social role functioning. Stigma and discrimination is a prevalent experience for PSD in all parts of the world, and limits access to health care, opportunity and capacity for community participation<sup>5</sup>. It results in unequal access to resources, capabilities and rights which leads to health inequalities and social exclusion<sup>6</sup>. Policy guidance on social inclusion and community participation in the sphere of global mental health has been broad, with few specifics on what to measure and how to operationalise or measure participation by affected individuals<sup>7</sup>. In a paper describing the top 40 challenges for Global Mental health in 2011, ‘*to develop culturally informed methods to eliminate the stigma, discrimination and social exclusion of patients and families across cultural settings*’ was ranked as the second most important challenge<sup>8</sup>. To engage and respond to the real challenges for social exclusion and psycho-social disability, we recognise the contribution of the larger social, economic, cultural and political environment to the prevalence and experience of psycho-social disability. It is clear that people with greater social and economic disadvantage are at greater risk of common mental illnesses<sup>9</sup> and that this is particularly evident in LMIC<sup>10</sup>.

The importance of social inclusion for access to services has become more evident, and it has been identified as key to reducing health inequalities by increasing health-related knowledge<sup>11</sup>, improving people’s control of their health and promoting healthy behaviours<sup>12</sup>. Participation can impact directly and indirectly on health. Opportunity to participate in accessing sanitation, clean water, health and education services can directly improve health. However participation in domains of life such as community consultations, religious gatherings and disabled persons groups can also

1  
2  
3 indirectly impact health through strengthened social capital, social inclusion and a sense of  
4 belonging<sup>11 13</sup>.

5  
6 There is limited research in LMIC, and particularly little evidence from setting of North India, to  
7 understand the ways that social exclusion and disability interact for PPSD in access to services and  
8 community participation<sup>7 8 14</sup>. Within a broader study of disability<sup>15</sup> the aim of this study was to  
9 describe the prevalence of psycho-social disability and its association with social determinants of  
10 health and to examine barriers to participation among people with and without psycho-social  
11 disability.  
12  
13

## 14 15 METHODS

### 16 17 **Setting**

18 Publicly funded human resources and infra-structure for disability in Dehradun district, Uttarakhand, are  
19 limited, and although the state provides some residential institutional care for people with intellectual  
20 disability, and runs a disability resource centre, most PPSD do not access government services, with a  
21 recent study showing that as many as 96% of people screened as having depression did not have access to  
22 care<sup>16</sup>.  
23  
24  
25

26 A cross sectional population based survey was completed in 2015 in Sahaspur block, Dehradun District in  
27 the northern Indian state of Uttarakhand using the Rapid Assessment of Disability (RAD) survey. The RAD  
28 survey was developed by the Nossal Institute for Global Health and the Centre for Eye Research Australia  
29 at The University of Melbourne, and was validated in Bangladesh and Fiji, and underwent rigorous pre-  
30 testing and piloting in India to ensure content validity, prior to the actual survey<sup>17</sup>. Greater detail on the  
31 methods used in this study are provided in another paper which examined the prevalence of all types of  
32 disability and its' associations with health determinants and access and barriers to community services<sup>15</sup>.  
33  
34  
35

### 36 37 **Sampling**

38 The main study was conducted on a sample of 2441 individuals aged 15 years and over from Sahaspur  
39 block in Dehradun District. This study used a two-stage cluster random sampling where 50 clusters from  
40 114 villages in Sahaspur block using probability proportion to size sampling, an approach that is useful  
41 when the units are of unequal sizes, and ensures the likelihood of a unit being selected is proportionate to  
42 the size of the represented population. The second stage involved dividing each selected cluster into five  
43 distinct segments from which 10 people aged 18 years and above were selected from each segment to  
44 reach a total of 50 participants. Finally, for each person identified to be at risk of disability, an age (+/- 2  
45 years) and gender matched control was recruited from an adjacent household.  
46  
47

### 48 49 **Data collection and the survey tool**

50 Eleven data collectors, three of whom had a disability were identified: 8 females and 3 males aged  
51 between 19 and 53 years, and given a four-day training in data collection. The RAD provides the ability to  
52 measure disability in a population and understand the barriers to participation across a range of life  
53 domains<sup>17</sup>. The RAD included an interviewer-administered household questionnaire conducted with the  
54 household head, and an individual questionnaire. The household questionnaire assessed the household  
55 demographics, characteristics and assets.  
56  
57  
58  
59  
60

1  
2  
3 The individual questionnaire had four sections. Demographic information including age, gender, ethnicity,  
4 religion, marital status, education level and occupation as Section One. The second section was self-  
5 assessment of functioning designed to capture functional limitations on activities related to vision, hearing,  
6 communication, mobility, gross and fine motor skills, cognition, appearance and psychological distress.  
7 This study reports on the psychological distress component, which is a modified version of the Kessler-6 (K-  
8 6) scale which is a tool validated to screen for both severe and common mental illness, although scoring of  
9 K-6 does not recommend a single-parameter cut-off score<sup>18 19</sup>. The response categories for the modified K-  
10 6 used in RAD were 'none', 'some of the time', 'most of the time,' and 'all of the time'. As this study was  
11 focusing on subjective experiences of limited functioning, participants were considered to have a disability  
12 if they had difficulties "most of the time" or "all of the time" in at least two domains in the items on  
13 Kessler's scale. Section three of the RAD comprised 16 questions related to general health, relationships,  
14 respect and taking of one's self and assessed the individual's perception of well-being. Questions were  
15 reported on a four-point Likert scale ranging from 'never' to 'all of the time'. Section four assessed the  
16 level of access to different services and participation in the community under domains of employment,  
17 health services, community consultations, disabled persons' organisations, social activities, sanitation, safe  
18 drinking water and religion. If a participant reported more than one barrier, they were asked to report the  
19 most limiting barrier. In this paper, only the most limiting barriers were reported.  
20  
21  
22  
23

### 24 **Statistical analysis**

25 Statistical analysis used Stata 14.0<sup>20</sup>. Odds ratios, both crude and adjusted were calculated using  
26 logistic regression to assess the association between psycho-social disability, marital status, age,  
27 gender, socio-economic status, employment and schooling. Chi square and Fisher's exact tests were  
28 performed.  
29  
30

31  
32 Any form of school attendance was classified as 'schooled' and the five age categories were used (18-  
33 24, 25-34, 35-44, 45-54 and  $\geq 55$  years). Employment categories used were employed, not employed  
34 and home maker. The reference group characteristics were: male, 18-24 years, any schooling, not  
35 married, employed and of high socioeconomic status. To calculate the asset index, principal  
36 component analysis was used (rescaled to 0-1) as a proxy for socioeconomic status [16] using  
37 categorisations of poor (between 0 and 0.4), middle class (between 0.4 and 0.8) and rich (between 0.8  
38 and 1). Persons with psychosocial disabilities (cases) and persons without psychosocial disability  
39 (controls) were matched for age and sex to understand barriers of service utilisation and participation  
40 and compared.  
41  
42  
43

44 The ethics committee at the Indian Institute of Public Health - Hyderabad and the ethics committee of the  
45 CHGN Uttarakhand Cluster granted ethics approval. Written informed consent was obtained in ways  
46 appropriate for specific disabilities and people who were not literate gave witnessed verbal consent. A  
47 plain language statement was provided to each participant.  
48  
49

### 50 **RESULTS**

51 Out of 2500 people invited to undertake the survey, 2441 (97.6%) surveys were completed. The  
52 mean age of the participants was  $40.4 \pm 15.2$  years and 51.6% (n=1260) were male. Socio-  
53 demographic profile of the participants is presented in Table 1.  
54  
55  
56  
57  
58

**Table 1.** Profile of socio-demographic characteristics of survey participants

|              | Categories  | Total sample<br>n (%) | People without<br>psychosocial<br>disability<br>n (%) | People with<br>psychosocial<br>disability<br>n (%) |
|--------------|-------------|-----------------------|-------------------------------------------------------|----------------------------------------------------|
| <b>Total</b> |             | 2441 (100)            | 2326 (95.2)                                           | 117 (4.8)                                          |
| <b>Age</b>   | 18-24 years | 410 (16.8)            | 397 (17.1)                                            | 13 (11.0)                                          |
|              | 25-34 years | 544 (22.3)            | 522 (22.5)                                            | 22 (18.6)                                          |
|              | 35-44 years | 586 (24.0)            | 565 (24.3)                                            | 21 (17.8)                                          |
|              | 45-54 years | 396 (16.2)            | 381 (16.4)                                            | 15 (12.7)                                          |

The prevalence of psycho- social disability according to the study definition was 4.8%. with the prevalence of other types of disability self-reported at less than 2%. Of note, the prevalence of psychological distress, with no functional impairment, was only 1.2% meaning 75% of participants with psycho-social disability also reported comorbid functional impairments such as difficulties with mobility or eye-sight. Table 2 represents a model for the prevalence of psycho-social disability, adjusting for age, gender, marital status, occupation, and education.

**Table 2:** Association between socio-demographic factors and psycho-social disability

|                              |                                                                                             |                                    |                                  |                    |
|------------------------------|---------------------------------------------------------------------------------------------|------------------------------------|----------------------------------|--------------------|
|                              | ≥ 55 years                                                                                  | 505 (20.7)                         | 458 (19.7)                       | 46 (39.8)          |
| <b>Gender</b>                | Male                                                                                        | 1,260 (51.6)                       | 1,196 (51.5)                     | 64 (54.2)          |
|                              | Female                                                                                      | 1,181 (48.4)                       | 1,127 (48.5)                     | 53 (45.8)          |
| <b>Schooling</b>             | Yes                                                                                         | 1,888 (77.4)                       | 1,828 (78.7)                     | 60 (50.9)          |
|                              | No                                                                                          | 553 (22.7)                         | 495 (21.3)                       | 57 (49.2)          |
| <b>Socio-economic status</b> | Poor                                                                                        | 998 (40.9)                         | 933 (40.2)                       | 65 (55.1)          |
|                              | Middle                                                                                      | 983 (40.3)                         | 939 (40.4)                       | 43 (37.3)          |
|                              | Rich                                                                                        | 460 (18.8)                         | 451 (19.4)                       | 9 (7.6)            |
| <b>Marital status</b>        | Single                                                                                      | 409 (16.8)                         | 389 (16.8)                       | 20 (17.0)          |
|                              | Married                                                                                     | 1,866 (76.4)                       | 1,789 (77.0)                     | 76 (65.3)          |
|                              | Separated/Divorced/<br>Widowed                                                              | 166 (6.8)                          | 145 (6.2)                        | 21 (17.8)          |
| <b>Occupation</b>            | Employed                                                                                    | 1,222 (52.2)                       | 1,175 (52.9)                     | 47 (40.2)          |
|                              | Homemaker                                                                                   | 834 (35.7)                         | 796 (35.8)                       | 38 (32.5)          |
|                              | None                                                                                        | 283 (12.1)                         | 251 (11.3)                       | 32 (27.4)          |
| <b>Categories</b>            | <b>Prevalence of psychosocial disability using Kessler screening tool (%) Sample n=2411</b> | <b>Unadjusted OR (95%CI) n=117</b> | <b>Adjusted OR (95%CI) n=117</b> |                    |
| <b>Age</b>                   | 18-24 years                                                                                 | 3.17 (1.7-5.36)                    | -                                | -                  |
|                              | 25-34 years                                                                                 | 4.04 (2.55-6.06)                   | 1.3 (0.64-2.59)                  | 2.93 (1.0-8.78)    |
|                              | 35-44 years                                                                                 | 3.58 (2.22-5.43)                   | 1.2 (0.56-2.29)                  | 1.62 (0.31-8.41)   |
|                              | 45-54 years                                                                                 | 3.79 (2.14-6.17)                   | 1.2 (0.56-2.56)                  | 1.41 (0.23-8.63)   |
|                              | ≥ 55 years                                                                                  | 9.11 (6.75-11.96)                  | 3.13 (1.66-5.91)                 | 2.2 (0.59-8.22)    |
| <b>Gender</b>                | Female                                                                                      | 4.49 (3.38-5.82)                   |                                  |                    |
|                              | Male                                                                                        | 5.07 (3.93-5.44)                   | 1.12 (0.77-1.62)                 | 1.27 (0.72-2.21)   |
| <b>Schooling</b>             | Yes                                                                                         | 3.18 (2.43-4.07)                   |                                  |                    |
|                              | No                                                                                          | 10.31 (7.90 -13.15)                | 3.6 (2.44-5.21)                  | 2.3 (1.25-3.85)*   |
| <b>Marital status</b>        | Married                                                                                     | 4.89(3.01-7.45)                    |                                  |                    |
|                              | Single                                                                                      | 4.07(3.22-5.07)                    | 0.81 (0.51-1.39)                 | 0.43 (0.20-0.95)*  |
|                              | Separate/<br>widowed/<br>divorced                                                           | 12.65 (8.0-18.68)                  | 2.82 (1.47-5.39)                 | 3.25 (0.56-8.96)   |
| <b>Occupation</b>            | Employed                                                                                    | 3.84 (2.89-5.08)                   |                                  |                    |
|                              | Homemaker                                                                                   | 4.43 (3.14-6.06)                   | 1.19 (0.77-1.85)                 | 1.07 (0.58-2.0)    |
|                              | Unemployed                                                                                  | 11.31 (7.86-15.58)                 | 3.19 (1.98-5.12)                 | 2.90 (1.60-5.26)*  |
| <b>Socio-economic status</b> | Rich                                                                                        | 1.96(0.9-3.68)                     |                                  |                    |
|                              | Middle                                                                                      | 4.37 (3.18-5.85)                   | 2.35 (1.13-4.86)                 | 3.90 (1.57-9.67) * |
|                              | Poor                                                                                        | 6.41 (5.06-8.22)                   | 3.49 (1.72-7.1)                  | 4.63 (1.88-11.43)* |

An \* denotes a statistically significant association.

Table 2 demonstrates that the odds of having psycho-social disability were significantly higher in those with no schooling (2.3 times higher than those with schooling), unemployed people (2.9 times

higher than those employed) and people in both the middle and poorer levels of socio-economic status (3.9 and 4.6 times high respectively than those of rich socio-economic status). Table 3 explores unmet need among people with and without psycho-social disability.

**Table 3.** Unmet need in those with psychosocial disability versus those without psycho-social disability (selected domains)

| Domain                                                    | Need<br>(In the last 6 months, to<br>what extent have you<br>been able to access...?) | People<br>with PSD<br>(n = 117) | %     | People<br>without<br>PSD<br>(n = 2326) | %     | P-<br>Value |
|-----------------------------------------------------------|---------------------------------------------------------------------------------------|---------------------------------|-------|----------------------------------------|-------|-------------|
| <b>Work</b>                                               | MET NEED                                                                              | 43                              | 36.75 | 106                                    | 56.08 | <0.001      |
|                                                           | UNMET NEED                                                                            | 45                              | 38.46 | 27                                     | 14.29 |             |
| <b>Health<br/>Services</b>                                | MET NEED                                                                              | 66                              | 56.41 | 108                                    | 57.41 | <0.001      |
|                                                           | UNMET NEED                                                                            | 33                              | 28.21 | 25                                     | 13.23 |             |
| <b>Community<br/>Consultations</b>                        | MET NEED                                                                              | 31                              | 25.5  | 95                                     | 50.26 | <0.001      |
|                                                           | UNMET NEED                                                                            | 36                              | 30.77 | 28                                     | 14.81 |             |
| <b>Disabled<br/>Persons'<br/>Organisations<br/>(DPOs)</b> | MET NEED                                                                              | 7                               | 5.98  | 7                                      | 3.7   | <0.001      |
|                                                           | UNMET NEED                                                                            | 13                              | 11.11 | 10                                     | 5.29  |             |
| <b>Social<br/>Activities</b>                              | MET NEED                                                                              | 52                              | 44.44 | 119                                    | 62.96 | <0.001      |
|                                                           | UNMET NEED                                                                            | 28                              | 23.93 | 10                                     | 5.29  |             |
| <b>Sanitation</b>                                         | MET NEED                                                                              | 100                             | 85.47 | 187                                    | 98.94 | <0.001      |
|                                                           | UNMET NEED                                                                            | 17                              | 14.53 | 2                                      | 1.06  |             |
| <b>Safe Drinking<br/>Water</b>                            | MET NEED                                                                              | 91                              | 77.78 | 176                                    | 93.12 | <0.001      |
|                                                           | UNMET NEED                                                                            | 26                              | 22.22 | 13                                     | 6.88  |             |
| <b>Religion</b>                                           | MET NEED                                                                              | 73                              | 62.39 | 139                                    | 73.54 | 0.001       |
|                                                           | UNMET NEED                                                                            | 24                              | 20.51 | 12                                     | 6.35  |             |

*NB Domains measured but not listed above also addressed rehabilitation services, legal assistance, assistive devices and disaster management.*

In Table 3, across different access domains the unmet need was significantly higher in every domain for people with psycho-social disability, however when we removed the group who described that they did not want to participate, the difference between met and unmet need was not significant for Disabled Persons Organisations. More than a quarter of surveyed people with psycho-social disability described unmet need in relation to work (38%), health services (28%) and community consultation (30%). However, the unmet need was lower in some other domains as either the participants were not familiar with the service (e.g. nearly 80% of respondents did not know what a DPO was) or did not want to participate. Barriers faced in the different domains of daily life described above were assessed and are summarised in Table 4 below.

**Table 4.** Summary of barriers experienced to access domains of community services

| Barriers | People with PSD | Average | People without PSD | Average | P- value |
|----------|-----------------|---------|--------------------|---------|----------|
|----------|-----------------|---------|--------------------|---------|----------|

|                                          | (n = 117) | %    | (n = 2326) | %    |          |
|------------------------------------------|-----------|------|------------|------|----------|
| Lack of information                      | 146       | 47.7 | 104        | 30.7 | <0.0001* |
| Difficulty getting to services from home | 113       | 36.9 | 64         | 20.9 | 0.01*    |
| Physical inaccessibility                 | 128       | 41.8 | 31         | 10.1 | <0.0001* |
| Absence of reasonable accommodation      | 100       | 32.6 | 73         | 23.8 | 0.01*    |
| Cost                                     | 75        | 24.5 | 51         | 16.6 | 0.06     |
| Absence of personal assistance to visit  | 79        | 25.8 | 49         | 16.0 | 0.03*    |
| Not available                            | 41        | 13.4 | 56         | 18.3 | 0.01*    |
| Negative attitudes                       | 59        | 19.3 | 34         | 11.1 | 0.01*    |
| Family has difficulty assisting access   | 26        | 8.4  | 26         | 8.4  | 0.15     |
| Family did not want me to access         | 23        | 7.5  | 25         | 8.2  | 0.1      |

People with psycho-social disability encountered greater barriers in each domain than controls and Table 4 shows that barriers related to lack of information, difficulty getting to services, physical inaccessibility of services, unavailability of services, lack of reasonable accommodation, lack of accompanying assistance accessing services and perceived negative attitudes were significantly higher for PPSD. Table 5 describes the types of barriers encountered under selected access domains. We present only the domains which demonstrated a consistent difference for people with and without psycho-social disability.

**Table 5.** Barriers faced by people with psycho-social disability vs those without (selected access domains)

| Barriers                                                | People with PSD<br>n = 117 | %     | People without PSD | %    | P-value |
|---------------------------------------------------------|----------------------------|-------|--------------------|------|---------|
| <b>Place of work</b>                                    |                            |       |                    |      |         |
| Lack of information about work                          | 12                         | 10.26 | 10                 | 5.29 | 0.10    |
| Negative attitudes towards me at work                   | 11                         | 9.4   | 4                  | 2.1  | <0.001* |
| Difficulty getting to work from home                    | 17                         | 14.5  | 11                 | 5.8  | 0.01*   |
| <b>Health</b>                                           |                            |       |                    |      |         |
| Lack of information about health services               | 18                         | 15.4  | 12                 | 6.4  | 0.01*   |
| Negative attitudes towards me                           | 8                          | 6.8   | 4                  | 2.1  | 0.04*   |
| Difficulty getting to health services                   | 13                         | 11.1  | 8                  | 4.2  | 0.02*   |
| <b>Community Consultations</b>                          |                            |       |                    |      |         |
| Lack of information about community consultations       | 14                         | 12.0  | 18                 | 9.5  | 0.50    |
| Negative attitudes towards me                           | 12                         | 10.3  | 2                  | 1.1  | <0.001* |
| Difficulty getting to community meetings from home      | 16                         | 13.7  | 7                  | 3.7  | <0.001* |
| <b>Rehabilitation Services</b>                          |                            |       |                    |      |         |
| Lack of information about rehabilitation services       | 19                         | 16.2  | 12                 | 6.4  | 0.01*   |
| Negative attitudes towards you from rehab services      | 4                          | 3.4   | 0                  | 0    | 0.01*   |
| Difficulty getting to rehabilitation services from home | 9                          | 7.7   | 8                  | 4.2  | 0.20    |



|                                                                         |    |      |    |      |         |
|-------------------------------------------------------------------------|----|------|----|------|---------|
| <b>Safe drinking water</b>                                              |    |      |    |      |         |
| Lack of information about accessible safe water                         | 5  | 4.3  | 1  | 0.5  | 0.02*   |
| Negative attitudes towards me                                           | 6  | 5.1  | 1  | 0.5  | 0.01*   |
| Difficulty getting to safe water supplies (e.g. pumps, wells) from home | 8  | 6.8  | 3  | 1.6  | 0.02*   |
| <b>Social Activities</b>                                                |    |      |    |      |         |
| Lack of information about social activities                             | 5  | 4.3  | 3  | 1.6  | 0.15    |
| Negative attitudes towards me                                           | 5  | 4.3  | 2  | 1.1  | 0.07    |
| Difficulty getting to social venues from home                           | 13 | 11.1 | 1  | 0.5  | <0.001* |
| <b>Religion</b>                                                         |    |      |    |      |         |
| Lack of information about religious activities                          | 5  | 4.3  | 3  | 1.6  | 0.15    |
| Negative attitudes towards me                                           | 5  | 4.3  | 2  | 1.1  | 0.07    |
| Difficulty getting to religious venues from home                        | 11 | 9.4  | 3  | 1.6  | <0.001* |
| <b>Government Social Welfare Services</b>                               |    |      |    |      |         |
| Lack of information about Government social services                    | 12 | 10.3 | 6  | 3.2  | 0.01**  |
| Negative attitudes towards me                                           | 9  | 7.7  | 0  | 0.00 | <0.001* |
| Difficulty getting to social welfare services                           | 5  | 4.3  | 1  | 0.5  | 0.02*   |
| <b>Disabled Persons' Organisations</b>                                  |    |      |    |      |         |
| Lack of information about DPO services <sup>1</sup>                     | 11 | 9.4  | 3  | 1.6  | <0.001* |
| Negative attitudes towards me                                           | 1  | 0.9  | 1  | 0.5  | 0.73    |
| Difficulty getting to DPO venue from home                               | 5  | 4.3  | 3  | 1.6  | 0.152   |
| <b>Education</b>                                                        |    |      |    |      |         |
| Lack of information about education or training                         | 14 | 12.0 | 11 | 5.82 | 0.06    |
| Negative attitudes towards you                                          | 4  | 3.4  | 1  | 0.53 | 0.05    |
| Difficulty getting to education or training facilities                  | 7  | 6.0  | 2  | 1.06 | 0.01*   |

Lack of information about services as a barrier to access was significantly higher for people with psycho-social disability compared to matched controls in the domains of health services, rehabilitation services, safe drinking water, Government social services and DPOs i.e. in half of the domains described. 'Negative attitudes towards you' was identified as a significant barrier to services for PSD compared to controls in 6 of the 10 services described above. There was also a significant difference in negative attitudes perceived by people with psycho-social disability compared to controls in over half of the domains i.e. in domains of workplace, health, community consultations, rehabilitation services, safe drinking water and Government social welfare services. Surprisingly perhaps, physical accessibility was also a barrier that was significantly greater for people with psycho-social disability compared to controls (described in eight of ten domains).

## DISCUSSION

This cross-sectional survey in Sahaspur Block of Dehradun district revealed a prevalence of psycho-social disability of 4.8%, considerably higher than 0.06% prevalence rate for psychosocial disability described in the 2011 census in Uttarakhand<sup>21</sup>. The broad definition of PSD used in this survey as well as the use of non-stigmatising language is likely to have led to a higher number of people identified and may explain part of this difference in prevalence<sup>15</sup>. The prevalence identified in this study aligns with the prevalence of mental illness in India ranging from 3.4% to 8.9% described in

<sup>1</sup> Other aspects of the DPO domain had too few numbers for useful analysis

1  
2  
3 meta-analytic studies, using a range of tools and definitions<sup>22 23</sup> and also aligns fairly closely with a  
4 recent cross-sectional population survey conducted in the district of Dehradun conducted by the  
5 same lead author, that described the prevalence of depression as 6.0%, using a depression screening  
6 tool<sup>16</sup>.  
7

8  
9 This study finds risks of psycho-social disability are two to four times higher among people who have  
10 low education, unemployment and middle or low socio-economic status. Given that three-quarters  
11 of those who identified themselves as having psycho-social disability also described a co-morbid  
12 functional impairment it seems likely that functional impairment itself may increase mental distress.  
13 This significant contribution of social determinants of health was also found in the cross-sectional  
14 study of depression described above where the risk of depression was two to four times higher  
15 among people with limited schooling, poor housing, indebtedness and membership of oppressed  
16 castes<sup>16</sup>. The mechanisms by which social health determinants lead to increased psycho-social  
17 disability are likely to be complex with multiple mediating factors<sup>10</sup>. In this study, we cannot  
18 determine the direction of causation however a systematic review that assessed links between  
19 common mental disorders and poverty similarly found strong relationships between education,  
20 housing, socio-economic status and common mental disorders, a finding supported by other key  
21 publications on social determinants of mental health.<sup>9 24</sup> Figure 1 shows a possible model for the  
22 two-way interaction of poverty and common psycho-social disability in a vicious cycle. We propose  
23 that with a social model of disability, disability itself, and other functional limitations can be located  
24 under the title of 'social causation'.  
25  
26  
27  
28  
29  
30  
31

32 **Figure 1.** Diagram developed by Crick et al, proposing a two-way interaction between poverty and  
33 mental ill-health<sup>10</sup>  
34

35  
36 The high rate of co-morbid functional impairment reported in this study suggests a high rate of other  
37 forms of disability mixed with psycho-social disability although this cross-sectional study cannot  
38 ascertain directionality and causation (it is likely that those with functional impairment are also at  
39 higher risk of psycho-social distress). This finding is supported by this study's assessment of barriers  
40 to community services where there is a high rate of reporting of physical barriers to services and in  
41 particular, identification of the lack of physical access/ transport difficulties for people with psycho-  
42 social disability. It clearly points to the need for policies and programmes to promote mental health  
43 knowledge and skills for all people with disabilities. Additionally, mental health policies and  
44 programmes must ensure inclusion of all people with disabilities, and seek to reduce the multiple  
45 types of barriers that limit access to care and community participation.  
46  
47

48  
49 This study presents one of the first accounts of barriers experienced by people with psycho-social  
50 disability for access to services in India. While the total percentage numbers of PPSD who identify  
51 barriers to access community services are lower than expected, it is notable that PPSD are  
52 significantly more likely to describe barriers in multiple domains of life, when compared to matched  
53 controls. While the UNCRPD makes it clear that disability is influenced by both medical limitations  
54 and social prejudice, the ways that this plays out for people who suffer from psycho-social disability  
55 to limit their community participation is rarely assessed. The three key barriers to participation most  
56  
57

frequently identified by participants with psycho-social disability in this study are related to attitudes (negative attitudes towards me), practices (lack of accommodation to support access to services) and structures (e.g. making it difficult to get to services), which are similar to findings in a study examining participation of people with psycho-social disability in mental health policy development in South Africa<sup>2</sup>. Our study shows that people with psycho-social disability describe stigma (negative attitudes) as a significant barrier in nearly half of the domains of services described here. A number of papers have described experiences of stigma of people with psycho-social disability in India and in particular how this can negatively impact access to mental health services<sup>25-27</sup> however this study is likely the first paper to demonstrate how perceived negative attitude interact with domains of community services and participation. Reasons why negative attitudes were not identified as limiting access to some community services is not clear and this is an area that requires further research. The impact of multiple marginalities such as membership of an excluded social group or having female gender and low education status adding to the disadvantage of disability has been identified as a basis for additional exclusion of those with PSD<sup>28 29</sup>.

In the multiple domains assessed in this study lack of information and physical accessibility were also frequently perceived as barriers to participation by people with psycho-social disability. The contribution of co-existing functional impairment is likely to explain the barriers related to physical accessibility and transport. While lack of access to information is high (34%) in the general community, it is even higher for people with PSD (50%). Possible reasons why lack of information appears to be a greater barrier for people with psycho-social disability could be that this group has lower literacy and fewer social contacts and networks (so less information comes their way), and that they are less motivated in seeking out information. Perhaps this group also has reduced access to mass media such as television or radio.

There are ample policies and legal structures to promote access and participation for people with disabilities in India including those with PSD. India was one of the first countries to sign the UNCRPD and recently passed the Mental Health Care Act (2017) both documents of which include components to support participation and access to services. The new Rights of Persons with disabilities act (2016) clearly includes people with mental illness, and builds on the Persons with disabilities act (1995) to push for a more disabled inclusive and accessible environment<sup>30</sup>. At the same time, we join with others to observe that access to services and participation for people with PSD remains limited, and implementation and regulation are very weak links in the chain in relation to health services and policies in India<sup>30 31</sup>.

Programmatic implementation at all levels must intentionally seek to include people with psycho-social disability. This demands attention to increasing the accessibility of community level structures such as transport and dissemination of information related to services and entitlements so that they reach people with psycho-social disability. This will require using mediums that are accessible to those who have low literacy and who have limited social networks such as loudspeaker announcements which are used widely and effectively by campaigning political parties in India. It also requires changes in attitudes at all levels in the community and among service providers. A number of steps can be taken to reduce stigma and increase social inclusion in programmes related to health, education and sanitation which include increasing awareness in the community, educating service providers and increasing direct contact between people with psycho-social disability and others<sup>32</sup>.

1  
2  
3 A further clear message from this study is that since risk and protective factors for mental health act  
4 at several different levels, and include macro-economic health determinants, responses to them  
5 need to be multi-layered and multi-sectoral. Macro-policies that address poverty, education,  
6 welfare, transport, housing and employment sectors are required, with a 'health in all policies'  
7 approach<sup>9</sup>.and seems likely to also reduce the disease burden related to psycho-social disability<sup>33</sup>.  
8

### 9 **Methodological limitations**

10  
11 The Kessler tool is a screening rather than diagnostic tool, and excluded two key risk factors for  
12 psycho-social disability: stressful life events and chronic illness. While the Kessler-6 scale has been  
13 found to have moderate- to- high discriminating ability when used by lay workers in identifying  
14 common mental disorders in India<sup>34 35</sup>, it did not screen for the whole spectrum of psychosocial  
15 disability. A limitation of the findings presented in Table 3 and 5 particularly is that the numbers are  
16 small reducing the reliability of the findings and meaning that some findings that may well have  
17 been significant with a larger sample, were not elucidated. The study is limited to adults of over 18  
18 years of age, and so cannot assess the prevalence of psycho-social disability or barriers they face,  
19 among children. As the RAD survey tool used self-reported data there may be a risk of social  
20 desirability or recall bias. As a cross-sectional survey, it cannot attribute causality to apparent risk  
21 factors. A major strength of this study is that its data are from a randomly selected population  
22 covering rural, semi-urban and urban populations in North India. Multivariable analysis ensured that  
23 potentially confounding factors were considered.  
24  
25  
26

### 27 **CONCLUSIONS**

28  
29 Psycho-social disability in Dehradun district, Uttarakhand, with a prevalence of at least 4.8% is two  
30 or three times more common among people with co-morbid functional impairment who are  
31 economically deprived, who have had little education and who are unemployed. People with  
32 psycho-social disability face significant unmet needs related to community services and perceive  
33 negative social attitudes as a significant barrier limiting their participation in multiple domains. Social  
34 policy and programmes in India must take active steps to address social determinants of psycho-  
35 social disability such as increasing access to education and reduce economic deprivation.  
36 Additionally, action is needed at all levels of community programmes and services to increase social  
37 inclusion of people with psycho-social disability.  
38  
39

### 40 **ACKNOWLEDGEMENTS**

41  
42 The authors would like to thank CBM for the funding support, their responsiveness and helpful  
43 engagement throughout the duration of the entire RAD project. With CBM's sponsorship, the Public  
44 Health Foundation of India and the Nossal Institute for Global health of the University of Melbourne  
45 became partners in conducting this research. We acknowledge the support of field research teams  
46 under the CHGN Uttarakhand Cluster for their support in data collection. The teams were AKS HOPE,  
47 OPEN, Chamba Christian hospital and EHA (Samvedna and Anugrah projects). The authors declare  
48 they have no competing interests in publishing this paper.  
49  
50  
51  
52  
53  
54  
55  
56  
57  
58  
59  
60

## REFERENCES

1. Drew N, Funk M, Tang S, et al. Human rights violations of people with mental and psychosocial disabilities: an unresolved global crisis. *Lancet* 2011;378(9803):1664-75. doi: 10.1016/s0140-6736(11)61458-x [published Online First: 2011/10/20]
2. Kleintjes S, Lund C, Swartz L. Barriers to the participation of people with psychosocial disability in mental health policy development in South Africa: a qualitative study of perspectives of policy makers, professionals, religious leaders and academics. *BMC Int Health Hum Rights* 2013;13:17. doi: 10.1186/1472-698x-13-17 [published Online First: 2013/03/19]
3. Braithwaite J, Mont D. Disability and poverty: A survey of World Bank Poverty Assessments and implications. *ALTER - European Journal of Disability Research / Revue Européenne de Recherche sur le Handicap* 2009;3(3):219-32. doi: <https://doi.org/10.1016/j.alter.2008.10.002>
4. United Nations. United Nations Conventions on the Rights of Persons with Disabilities. Geneva, 2008.
5. Link B, Phelan J. Conceptualizing stigma. *Annu Rev Sociol* 2001;27:363 - 85.
6. Popay J, Escorel S, Hernandez M, et al. Understanding and tackling social exclusion - Final Report to the WHO Commission on Social Determinants of Health WHO Social Exclusion Knowledge Network. Geneva: World Health Organisation, 2008.
7. Baumgartner J, Burns J. Measuring social inclusion—a key outcome in global mental health. *Int J Epidemiol* 2014;43(2):354-64. doi: 10.1093/ije/dyt224
8. Collins P, Patel V, Joestl S. Grand challenges in Global mental health. *Nature* 2011;475:27-30.
9. Organization WH. Social determinants of mental health: World Health Organization 2014.
10. Lund C, Breen A, Flisher AJ, et al. Poverty and common mental disorders in low and middle income countries: A systematic review. *Soc Sci Med* 2010;71(3):517-28. doi: 10.1016/j.socscimed.2010.04.027 [published Online First: 2010/07/14]
11. Campbell C, Jovchelovitch S. Health, Community and Development : toward a social psychology of participation. *Journal of Community and Applied Social Psychology* 2007;10:255-70.
12. Bandura A. Self efficacy in changing societies. Cambridge: Cambridge University Press 1996.
13. Baum F, Palmer C. 'Opportunity structures': urban landscape, social capital and health promotion in Australia. *Health Promotion International* 2002;17(4):351-61.
14. Mathias K, Kermode K, San Sebastian M, et al. Under the banyan tree - exclusion and inclusion of people with mental distress in rural North India. *BMC Public Health* 2015;15(446) doi: 10.1186/s12889-015-1778-2
15. Grills N, Singh L, Pant H, et al. Inferior access to services and greater barriers faced by people with disabilities compared to those without disability: a quantitative survey using Rapid Assessment of Disability tool. . *Disability, CBR & Inclusive Development Journal* 2017;(in press - September 2017)
16. Mathias K, Goicolea I, Kermode M, et al. Cross-sectional study of depression and help-seeking in Uttarakhand, North India. *BMJ Open* 2015;5(11) doi: 10.1136/bmjopen-2015-008992
17. Marella M, Busijia L, Islam A, et al. Field-testing of the rapid assessment of disability questionnaire. *BMC Public Health* 2014;14(1) doi: 10.1186/1471-2458-14-900
18. Kessler RC, Barker PR, Colpe LJ, et al. Screening for serious mental illness in the general population. *Arch Gen Psychiatry* 2003;60(2):184-89.
19. Kessler RC, Andrews G, Colpe LJ, et al. Short screening scales to monitor population prevalences and trends in non-specific psychological distress. *Psychol Med* 2002;32(06):959-76.
20. LP SC. Stata statistical software. College Station: StataCorpLP, 2015.
21. Government of India. Census 2011 2011 [Available from: <http://www.census2011.co.in/census> accessed 29 September 2014.

- 1
- 2
- 3 22. Ganguli H. Epidemiological findings on prevalence of mental disorders in India. *Indian J Psychiatr*
- 4 2000;42(1):14-20.
- 5 23. Reddy VM, Chandrashekar C. Prevalence of mental and behavioural disorders in India: A meta-
- 6 analysis. *Indian J Psychiatry* 1998;40(2):149.
- 7 24. World Health Organisation. Risks to mental health : an overview of vulnerabilities and risk
- 8 factors. In: WHO Secretariat for the development of a comprehensive mental health action
- 9 plan, ed. Geneva: WHO, 2012.
- 10 25. Koschorke M, Padmavati R, Kumar S, et al. Experiences of stigma and discrimination of people
- 11 with schizophrenia in India. *Soc Sci Med* 2014;123:149-59. doi:
- 12 <https://doi.org/10.1016/j.socscimed.2014.10.035>
- 13 26. Raguram R, Raghu TM, Vounatsou P, et al. Schizophrenia and the cultural epidemiology of stigma
- 14 in Bangalore, India. *J Nerv Ment Dis* 2004;192(11):734-44.
- 15 27. Venkatesh BT, Andrews T, Mayya SS, et al. Perception of stigma toward mental illness in South
- 16 India. *Journal of family medicine and primary care* 2015;4(3):449-53. doi: 10.4103/2249-
- 17 4863.161352 [published Online First: 2015/08/20]
- 18 28. Mehrotra N. Disability, Gender and Caste: Marginality, Exclusion and Opportunities in Indian
- 19 Economy. *Women's Link* 2012;18(2):5-8.
- 20 29. Mehrotra N. Negotiating gender and disability in rural Haryana. *Sociological bulletin* 2006:406-
- 21 26.
- 22 30. Mehrotra N. Disability rights movements in India: Politics and practice. *Economic & Political*
- 23 *Weekly* 2011;46(6):65-72.
- 24 31. Addlakha R, Mandal S. Disability Law in India: Paradigm Shift or Evolving Discourse? *Economic*
- 25 *and Political Weekly* 2009:62-68.
- 26 32. Collins R, Wong E, Cerully J. Interventions to reduce mental health stigma and discrimination - a
- 27 literature review to guide evaluation of California's mental health prevention and early
- 28 intervention initiative. Los Angeles: California Mental Health Services Authority, 2012.
- 29 33. Lund C, De Silva M, Plagerson S, et al. Poverty and mental disorders: breaking the cycle in low-
- 30 income and middle-income countries. *Lancet* 2011;378(9801):1502-14. doi: 10.1016/s0140-
- 31 6736(11)60754-x [published Online First: 2011/10/20]
- 32 34. Chowdhary N, Patel V. Detection of common mental disorder and alcohol use disorders in HIV
- 33 infected people: A validation study in Goa, India. *Asian J Psychiatr* 2010;3(3):130-33. doi:
- 34 <http://dx.doi.org/10.1016/j.ajp.2010.08.002>
- 35 35. Patel V, Araya R, Chowdhary N, et al. Detecting common mental disorders in primary care in
- 36 India: a comparison of five screening questionnaires. *Psychol Med* 2008;38(2):221-8. doi:
- 37 10.1017/s0033291707002334 [published Online First: 2007/12/01]
- 38
- 39
- 40
- 41
- 42
- 43
- 44
- 45
- 46
- 47
- 48
- 49
- 50
- 51
- 52
- 53
- 54
- 55
- 56
- 57
- 58
- 59
- 60



1  
2  
3  
4  
5  
6  
7  
8  
9  
10  
11  
12  
13  
14  
15  
16  
17  
18  
19  
20  
21  
22  
23  
24  
25  
26  
27  
28  
29  
30  
31  
32  
33  
34  
35  
36  
37  
38  
39  
40  
41  
42  
43  
44  
45  
46  
47  
48  
49  
50  
51  
52  
53  
54  
55  
56  
57  
58  
59  
60

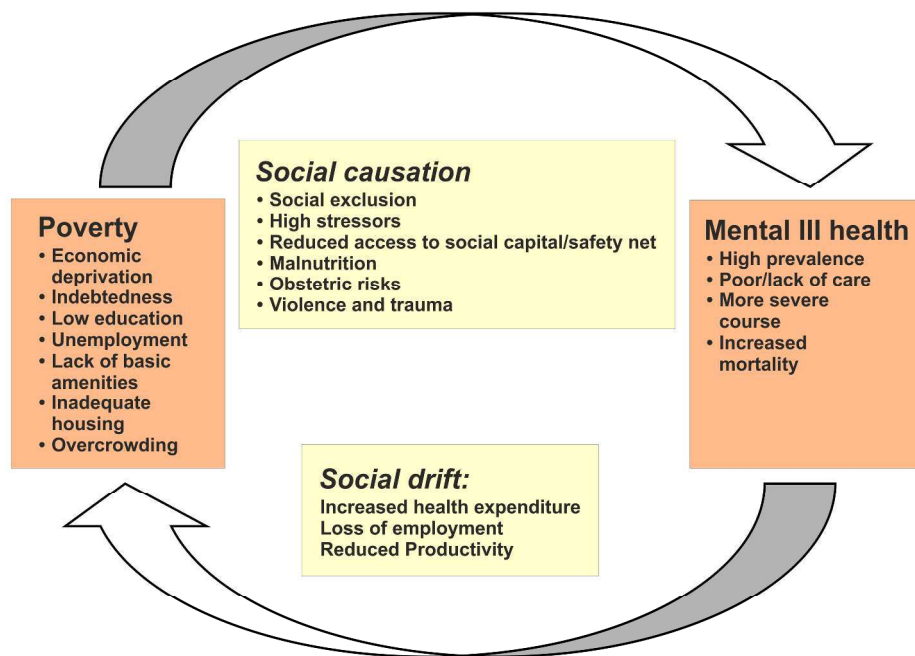

310x223mm (300 x 300 DPI)

ew only

**STROBE 2007 (v4) checklist of items to be included in reports of observational studies in epidemiology\***  
**Checklist for cohort, case-control, and cross-sectional studies (combined)**

| Section/Topic             | Item # | Recommendation                                                                                                                                                                                                                                                                                                                                                                                                                                                         | Reported on page #                                    |
|---------------------------|--------|------------------------------------------------------------------------------------------------------------------------------------------------------------------------------------------------------------------------------------------------------------------------------------------------------------------------------------------------------------------------------------------------------------------------------------------------------------------------|-------------------------------------------------------|
| Title and abstract        | 1      | (a) Indicate the study's design with a commonly used term in the title or the abstract                                                                                                                                                                                                                                                                                                                                                                                 | Y                                                     |
|                           |        | (b) Provide in the abstract an informative and balanced summary of what was done and what was found                                                                                                                                                                                                                                                                                                                                                                    | Y                                                     |
| <b>Introduction</b>       |        |                                                                                                                                                                                                                                                                                                                                                                                                                                                                        |                                                       |
| Background/rationale      | 2      | Explain the scientific background and rationale for the investigation being reported                                                                                                                                                                                                                                                                                                                                                                                   | Y                                                     |
| Objectives                | 3      | State specific objectives, including any pre-specified hypotheses                                                                                                                                                                                                                                                                                                                                                                                                      | Y                                                     |
| <b>Methods</b>            |        |                                                                                                                                                                                                                                                                                                                                                                                                                                                                        |                                                       |
| Study design              | 4      | Present key elements of study design early in the paper                                                                                                                                                                                                                                                                                                                                                                                                                | Y                                                     |
| Setting                   | 5      | Describe the setting, locations, and relevant dates, including periods of recruitment, exposure, follow-up, and data collection                                                                                                                                                                                                                                                                                                                                        | Y                                                     |
| Participants              | 6      | (a) <i>Cohort study</i> —Give the eligibility criteria, and the sources and methods of selection of participants. Describe methods of follow-up<br><i>Case-control study</i> —Give the eligibility criteria, and the sources and methods of case ascertainment and control selection. Give the rationale for the choice of cases and controls<br><i>Cross-sectional study</i> —Give the eligibility criteria, and the sources and methods of selection of participants | Cross sectional – eligibility sources and methods - Y |
|                           |        | (b) <i>Cohort study</i> —For matched studies, give matching criteria and number of exposed and unexposed<br><i>Case-control study</i> —For matched studies, give matching criteria and the number of controls per case                                                                                                                                                                                                                                                 |                                                       |
| Variables                 | 7      | Clearly define all outcomes, exposures, predictors, potential confounders, and effect modifiers. Give diagnostic criteria, if applicable                                                                                                                                                                                                                                                                                                                               | Y                                                     |
| Data sources/ measurement | 8*     | For each variable of interest, give sources of data and details of methods of assessment (measurement). Describe comparability of assessment methods if there is more than one group                                                                                                                                                                                                                                                                                   | Y                                                     |
| Bias                      | 9      | Describe any efforts to address potential sources of bias                                                                                                                                                                                                                                                                                                                                                                                                              | Y                                                     |
| Study size                | 10     | Explain how the study size was arrived at                                                                                                                                                                                                                                                                                                                                                                                                                              | Y                                                     |
| Quantitative variables    | 11     | Explain how quantitative variables were handled in the analyses. If applicable, describe which groupings were chosen and why                                                                                                                                                                                                                                                                                                                                           | Y                                                     |
| Statistical methods       | 12     | (a) Describe all statistical methods, including those used to control for confounding                                                                                                                                                                                                                                                                                                                                                                                  | Y                                                     |
|                           |        | (b) Describe any methods used to examine subgroups and interactions                                                                                                                                                                                                                                                                                                                                                                                                    | Y                                                     |
|                           |        | (c) Explain how missing data were addressed                                                                                                                                                                                                                                                                                                                                                                                                                            | NA                                                    |
|                           |        | (d) <i>Cohort study</i> —If applicable, explain how loss to follow-up was addressed<br><i>Case-control study</i> —If applicable, explain how matching of cases and controls was addressed                                                                                                                                                                                                                                                                              | Y                                                     |



|                          |     |                                                                                                                                                                                                              |    |
|--------------------------|-----|--------------------------------------------------------------------------------------------------------------------------------------------------------------------------------------------------------------|----|
|                          |     | <i>Cross-sectional study</i> —If applicable, describe analytical methods taking account of sampling strategy                                                                                                 |    |
|                          |     | (e) Describe any sensitivity analyses                                                                                                                                                                        | NA |
| <b>Results</b>           |     |                                                                                                                                                                                                              |    |
| Participants             | 13* | (a) Report numbers of individuals at each stage of study—eg numbers potentially eligible, examined for eligibility, confirmed eligible, included in the study, completing follow-up, and analysed            | Y  |
|                          |     | (b) Give reasons for non-participation at each stage                                                                                                                                                         | NA |
|                          |     | (c) Consider use of a flow diagram                                                                                                                                                                           | Y  |
| Descriptive data         | 14* | (a) Give characteristics of study participants (eg demographic, clinical, social) and information on exposures and potential confounders                                                                     | Y  |
|                          |     | (b) Indicate number of participants with missing data for each variable of interest                                                                                                                          | NA |
|                          |     | (c) <i>Cohort study</i> —Summarise follow-up time (eg, average and total amount)                                                                                                                             |    |
| Outcome data             | 15* | <i>Cohort study</i> —Report numbers of outcome events or summary measures over time                                                                                                                          |    |
|                          |     | <i>Case-control study</i> —Report numbers in each exposure category, or summary measures of exposure                                                                                                         |    |
|                          |     | <i>Cross-sectional study</i> —Report numbers of outcome events or summary measures                                                                                                                           | Y  |
| Main results             | 16  | (a) Give unadjusted estimates and, if applicable, confounder-adjusted estimates and their precision (eg, 95% confidence interval). Make clear which confounders were adjusted for and why they were included | YY |
|                          |     | (b) Report category boundaries when continuous variables were categorized                                                                                                                                    | Y  |
|                          |     | (c) If relevant, consider translating estimates of relative risk into absolute risk for a meaningful time period                                                                                             | Y  |
| Other analyses           | 17  | Report other analyses done—eg analyses of subgroups and interactions, and sensitivity analyses                                                                                                               | Y  |
| <b>Discussion</b>        |     |                                                                                                                                                                                                              |    |
| Key results              | 18  | Summarise key results with reference to study objectives                                                                                                                                                     | Y  |
| Limitations              | 19  | Discuss limitations of the study, taking into account sources of potential bias or imprecision. Discuss both direction and magnitude of any potential bias                                                   | Y  |
| Interpretation           | 20  | Give a cautious overall interpretation of results considering objectives, limitations, multiplicity of analyses, results from similar studies, and other relevant evidence                                   | Y  |
| Generalisability         | 21  | Discuss the generalisability (external validity) of the study results                                                                                                                                        | Y  |
| <b>Other information</b> |     |                                                                                                                                                                                                              |    |
| Funding                  | 22  | Give the source of funding and the role of the funders for the present study and, if applicable, for the original study on which the present article is based                                                | Y  |

\*Give information separately for cases and controls in case-control studies and, if applicable, for exposed and unexposed groups in cohort and cross-sectional studies.

**Note:** An Explanation and Elaboration article discusses each checklist item and gives methodological background and published examples of transparent reporting. The STROBE checklist is best used in conjunction with this article (freely available on the Web sites of PLoS Medicine at <http://www.plosmedicine.org/>, Annals of Internal Medicine at <http://www.annals.org/>, and Epidemiology at <http://www.epidem.com/>). Information on the STROBE Initiative is available at [www.strobe-statement.org](http://www.strobe-statement.org).

# BMJ Open

## Multiple barriers to participation for people with psychosocial disability in Dehradun district, North India – a cross-sectional study

|                                 |                                                                                                                                                                                                                                                                                                                                                                                    |
|---------------------------------|------------------------------------------------------------------------------------------------------------------------------------------------------------------------------------------------------------------------------------------------------------------------------------------------------------------------------------------------------------------------------------|
| Journal:                        | <i>BMJ Open</i>                                                                                                                                                                                                                                                                                                                                                                    |
| Manuscript ID                   | bmjopen-2017-019443.R2                                                                                                                                                                                                                                                                                                                                                             |
| Article Type:                   | Research                                                                                                                                                                                                                                                                                                                                                                           |
| Date Submitted by the Author:   | 24-Dec-2017                                                                                                                                                                                                                                                                                                                                                                        |
| Complete List of Authors:       | Mathias, Kaaren; Emmanuel Hospital Association, Landour Community Hospital, Mussoorie<br>Pant, Hira; Public Health Foundation of India, Indian Institute of Public Health,<br>Marella, M; University of Melbourne<br>Singh, Lawrence; AKS Hope<br>Murthy, GVS; Public Health Foundation of India<br>Grills, Nathan; The University of Melbourne, Nossal Institute of Global Health |
| <b>Primary Subject Heading</b>: | Global health                                                                                                                                                                                                                                                                                                                                                                      |
| Secondary Subject Heading:      | Epidemiology, Mental health, Public health                                                                                                                                                                                                                                                                                                                                         |
| Keywords:                       | MENTAL HEALTH, Depression & mood disorders < PSYCHIATRY, Anxiety disorders < PSYCHIATRY, EPIDEMIOLOGY                                                                                                                                                                                                                                                                              |
|                                 |                                                                                                                                                                                                                                                                                                                                                                                    |

SCHOLARONE™  
Manuscripts

1  
2  
3 **Multiple barriers to participation for people with psychosocial disability in Dehradun district,**  
4 **North India – a cross-sectional study**  
5

6 **Mathias, K, Pant, H, Marella, M, Singh, L, Murthy, GVS, Grills, N**  
7

8 Corresponding author

9 Kaaren Mathias

10 Landour Community Hospital

11 Mussoorie

12 Uttarakhand

13 248179

14 INDIA

15 [kaaren@eha-health.org](mailto:kaaren@eha-health.org)  
16

17  
18  
19  
20  
21 Phone +91 7895 121535  
22

23 Hira Pant - Public Health Foundation of India, Indian Institute of Public Health  
24 Plot # 1, Rd Number 44, Masthan Nagar, Kavuri Hills, Madhapur, Hyderabad, Telangana 500033  
25

26  
27 Manju Marella - University of Melbourne, Nossal Institute for Global Health, 333 Exhibition St,  
28 Melbourne VIC 3004, Australia  
29

30  
31 Lawrence Singh - Parimahal, D-55 Aman Vihar, Lane D-10, Village Chidowali, P.O. - Kandoli  
32 ,Sahastradhara Road, Dehradun, Uttarakhand 248001  
33

34  
35 GVS Murthy - Indian Institute of Public Health, Public Health Foundation of India  
36 Plot # 1, Rd Number 44, Masthan Nagar, Kavuri Hills, Madhapur, Hyderabad, Telangana 500033  
37

38  
39 Nathan Grills - - University of Melbourne, Nossal Institute for Global Health, 333 Exhibition St,  
40 Melbourne VIC 3004, Australia  
41  
42  
43  
44  
45  
46  
47  
48  
49  
50  
51  
52  
53  
54  
55  
56  
57  
58  
59  
60

## Abstract

### OBJECTIVES

This study used a population-based cross-sectional survey to describe the prevalence of psycho-social disability and unmet need for access to services in North India

### SETTING

This study was conducted in Dehradun district, Uttarakhand in 2014.

### PARTICIPANTS

A population-based sample of 2441 people over the age of 18 years

### PRIMARY OUTCOME MEASURES

The Rapid Assessment of Disability (RAD) survey tool identified people with disability and used an adapted version of the Kessler scale to identify those with psycho-social disability. It additionally collected information on socio-economic variables, access to community services and barriers to participation. Prevalence of psycho-social disability and unmet needs, and descriptions of barriers to services were calculated, and multi-variable logistic regression were used to assess associations between risk factors and psycho-social disability.

### RESULTS

Prevalence of psycho-social disability was 4.8 % and 75% of participants with psychological distress also reported comorbid functional impairments. Adjusted odds-ratios for depression of more than 2 were found for people who were unschooled, unemployed and of moderate or poor socio-economic status. The unmet need for access to services was significantly higher in every domain for people with psycho-social disability and was more than 25% in the areas of employment, health service access and community consultation. People with psycho-social disability encountered greater barriers in each domain compared to controls.

### CONCLUSIONS

People who are poor, uneducated and unemployed are two to four times more likely to have psycho-social disability in Dehradun district. They face unmet needs in accessing community services and perceive negative social attitudes, lack of physical accessibility and lack of information as barriers limiting their participation. Social policy must increase access to education and reduce poverty but additionally ensure action is taken in all community services to increase information, physical accessibility and social inclusion of people with psycho-social and other forms of disability.

### KEY WORDS

Depression

Anxiety

Mental health

1  
2  
3 Epidemiology

4  
5 STRENGTHS AND LIMITATIONS

- 6 • This study uses a community-based randomly selected sample of adults to assess prevalence  
7 of psycho-social disability and barriers to participation
- 8 • This study presents one of the first assessments of barriers to community participation for  
9 people with psycho-social disability in India
- 10 • A limitation of this study is that it uses an adapted Kessler - 6 scale as screening tool to  
11 assess psycho-social disability rather than a definitive clinical assessment
- 12 • The cross-sectional design cannot indicate causation  
13  
14  
15

16  
17 CONTRIBUTORSHIP STATEMENT

18  
19 NG, GVS and MM conceived of the study and the overall design, HP and KM performed data analysis,  
20 and KM wrote the first and subsequent drafts. LS supported data collection and NG and MM  
21 supported study design, analysis and overview of the whole paper. All authors provided input into  
22 drafts of the paper.  
23

24  
25 FUNDING STATEMENT

26  
27 CBM (an international development organisation with a focus on disability) funded this research. As  
28 they are not a research council they do not use grant numbers.  
29

30  
31 DATA SHARING STATEMENT

32  
33 There is no additional unpublished data from this study available.  
34  
35  
36  
37  
38  
39  
40  
41  
42  
43  
44  
45  
46  
47  
48  
49  
50  
51  
52  
53  
54  
55  
56  
57  
58  
59  
60

## INTRODUCTION

Mental illness was the leading cause of years lived with disability in the 2010 Global Burden of Disease study, with the majority of people affected living in low and middle-income countries (LMIC). Psycho-social disability as a term refers to people who have either received a mental health diagnosis or who have identified that they experience limitations in functioning in basic psychological and social activities, and who have experienced the negative social impacts of psychological or social disability including discrimination, and exclusion<sup>1</sup>. We use this term to support our stance of a social model of disability that recognises that many barriers experienced are related to the way society limits the personal, social, political and economic power of people with disability<sup>1</sup>, can be constant or episodic and can be understood assessing activities of daily living and functional ranges<sup>3</sup>

To allow people with disabilities to fully enjoy all human, political and civil rights and fundamental freedoms, the United Nations Convention on the Rights of Persons with Disability (UNCRPD) acknowledges “the importance of accessibility to the physical, social, economic and cultural environment, to health and education and to information and communication”<sup>4</sup>. Yet in India, and beyond, at national and state levels, this accessibility is significantly limited for many people with disabilities due to lack of implementation and regulation of law and policies. Further barriers include stigma, lack of financial resources and a lack of evidence-based research to quantify and implement solutions.

While people with psycho-social disability are often physically able to access services, barriers for utilisation include real and perceived stigma, limited motivation and self-belief and limited social role functioning. Stigma and discrimination is a prevalent experience for PSD in all parts of the world, and limits access to health care, opportunity and capacity for community participation<sup>5</sup>. It results in unequal access to resources, capabilities and rights which leads to health inequalities and social exclusion<sup>6</sup>. Policy guidance on social inclusion and community participation in the sphere of global mental health has been broad, with few specifics on what to measure and how to operationalise or measure participation by affected individuals<sup>7</sup>. In a paper describing the top 40 challenges for Global Mental health in 2011, ‘*to develop culturally informed methods to eliminate the stigma, discrimination and social exclusion of patients and families across cultural settings*’ was ranked as the second most important challenge<sup>8</sup>. To engage and respond to the real challenges for social exclusion and psycho-social disability, we recognise the contribution of the larger social, economic, cultural and political environment to the prevalence and experience of psycho-social disability. It is clear that people with greater social and economic disadvantage are at greater risk of common mental illnesses<sup>9</sup> and that this is particularly evident in LMIC<sup>10</sup>.

The importance of social inclusion for access to services has become more evident, and it has been identified as key to reducing health inequalities by increasing health-related knowledge<sup>11</sup>, improving people’s control of their health and promoting healthy behaviours<sup>12</sup>. Participation can impact directly and indirectly on health. Opportunity to participate in accessing sanitation, clean water, health and education services can directly improve health. However participation in domains of life such as community consultations, religious gatherings and disabled persons groups can also

1  
2  
3 indirectly impact health through strengthened social capital, social inclusion and a sense of  
4 belonging<sup>11 13</sup>.

5  
6 There is limited research in LMIC, and particularly little evidence from setting of North India, to  
7 understand the ways that social exclusion and disability interact for PPSD in access to services and  
8 community participation<sup>7 8 14</sup>. Within a broader study of disability<sup>15</sup> the aim of this study was to  
9 describe the prevalence of psycho-social disability and its association with social determinants of  
10 health and to examine barriers to participation among people with and without psycho-social  
11 disability.  
12  
13

## 14 15 METHODS

### 16 17 **Setting**

18 Publicly funded human resources and infra-structure for disability in Dehradun district, Uttarakhand, are  
19 limited, and although the state provides some residential institutional care for people with intellectual  
20 disability, and runs a disability resource centre, most PPSD do not access government services, with a  
21 recent study showing that as many as 96% of people screened as having depression did not have access to  
22 care<sup>16</sup>.  
23  
24  
25

26 A cross sectional population based survey was completed in 2015 in Sahaspur block, Dehradun District in  
27 the northern Indian state of Uttarakhand using the Rapid Assessment of Disability (RAD) survey. The RAD  
28 survey was developed by the Nossal Institute for Global Health and the Centre for Eye Research Australia  
29 at The University of Melbourne, and was validated in Bangladesh and Fiji, and underwent rigorous pre-  
30 testing and piloting in India to ensure content validity, prior to the actual survey<sup>17</sup>. Greater detail on the  
31 methods used in this study are provided in another paper which examined the prevalence of all types of  
32 disability and its' associations with health determinants and access and barriers to community services<sup>15</sup>.  
33  
34  
35

### 36 37 **Sampling**

38 The main study was conducted on a sample of 2441 individuals aged 15 years and over from Sahaspur  
39 block in Dehradun District. This study used a two-stage cluster random sampling where 50 clusters from  
40 114 villages in Sahaspur block using probability proportion to size sampling, an approach that is useful  
41 when the units are of unequal sizes, and ensures the likelihood of a unit being selected is proportionate to  
42 the size of the represented population. The second stage involved dividing each selected cluster into five  
43 distinct segments from which 10 people aged 18 years and above were selected from each segment to  
44 reach a total of 50 participants. Finally, for each person identified to be at risk of disability, an age (+/- 2  
45 years) and gender matched control was recruited from an adjacent household to allow a comparison  
46 between persons with disabilities (cases) and persons without disability (controls) to understand the  
47 barriers of service utilisation and participation.  
48  
49

### 50 51 **Data collection and the survey tool**

52 Eleven data collectors, three of whom had a disability were identified: 8 females and 3 males aged  
53 between 19 and 53 years, and given a four-day training in data collection. The RAD provides the ability to  
54 measure disability in a population and understand the barriers to participation across a range of life  
55 domains<sup>17</sup>. The RAD included an interviewer-administered household questionnaire conducted with the  
56  
57  
58  
59  
60

1  
2  
3 household head, and an individual questionnaire. The household questionnaire assessed the household  
4 demographics, characteristics and assets.  
5

6 The individual questionnaire had four sections. Demographic information including age, gender,  
7 ethnicity, religion, marital status, education level and occupation as Section One. The second section  
8 was self-assessment of functioning designed to capture functional limitations on activities related to  
9 vision, hearing, communication, mobility, gross and fine motor skills, cognition, appearance and  
10 psychological distress. All study participants (N = 2441) filled Sections One and Two of the survey. This  
11 study reports on the psychological distress component, which is a modified version of the Kessler-6 (K-  
12 6) scale which is a tool validated to screen for both severe and common mental illness, although  
13 scoring of K-6 does not recommend a single-parameter cut-off score<sup>18 19</sup>. The response categories for  
14 the modified K-6 used in RAD were 'none', 'some of the time', 'most of the time,' and 'all of the time'.  
15 As this study was focusing on subjective experiences of limited functioning, participants were  
16 considered to have a disability if they had difficulties "most of the time" or "all of the time" in at least  
17 two domains in the items on Kessler's scale. Section three of the RAD comprised 16 questions related  
18 to general health, relationships, respect and taking of one's self and assessed the individual's  
19 perception of well-being. Questions were reported on a four-point Likert scale ranging from 'never' to  
20 'all of the time'. Section four assessed the level of access to different services and participation in the  
21 community under domains of employment, health services, community consultations, disabled  
22 persons' organisations, social activities, sanitation, safe drinking water and religion. If a participant  
23 reported more than one barrier, they were asked to report the most limiting barrier. In this paper,  
24 only the most limiting barriers were reported. From the total sample of participants selected for the  
25 study, only those identified to have disability and their age matched controls filled sections Three and  
26 Four (N = 306 people) were interviewed for sections 3 and 4 (which address well-being and adult  
27 access to community services), and of these, 117 had psycho-social disability and 189 (age and sex  
28 matched controls) did not have psycho-social disability.  
29  
30  
31  
32  
33  
34

### 35 **Statistical analysis**

36 Statistical analysis used Stata 14.0<sup>20</sup>. Odds ratios, both crude and adjusted were calculated using  
37 logistic regression to assess the association between psycho-social disability, marital status, age,  
38 gender, socio-economic status, employment and schooling. Chi square and Fisher's exact tests were  
39 performed.  
40

41  
42 Any form of school attendance was classified as 'schooled' and the five age categories were used (18-  
43 24, 25-34, 35-44, 45-54 and  $\geq 55$  years). Employment categories used were employed, not employed  
44 and home maker. The reference group characteristics were: male, 18-24 years, any schooling, not  
45 married, employed and of high socioeconomic status. To calculate the asset index, principal  
46 component analysis was used (rescaled to 0-1) as a proxy for socioeconomic status [16] using  
47 categorisations of poor (between 0 and 0.4), middle class (between 0.4 and 0.8) and rich (between 0.8  
48 and 1). Persons with psychosocial disabilities (cases) and persons without psychosocial disability  
49 (controls) were matched for age and sex to understand barriers of service utilisation and participation  
50 and compared.  
51  
52  
53

54 The ethics committee at the Indian Institute of Public Health - Hyderabad and the ethics committee of the  
55 CHGN Uttarakhand Cluster granted ethics approval. Written informed consent was obtained in ways  
56  
57



1  
2  
3  
4  
5  
6  
7  
8  
9  
10  
11  
12  
13  
14  
15  
16  
17  
18  
19  
20  
21  
22  
23  
24  
25  
26  
27  
28  
29  
30  
31  
32  
33  
34  
35  
36  
37  
38  
39  
40  
41  
42  
43  
44  
45  
46  
47  
48  
49  
50  
51  
52  
53  
54  
55  
56  
57  
58  
59  
60

appropriate for specific disabilities and people who were not literate gave witnessed verbal consent. A plain language statement was provided to each participant.

RESULTS

Out of 2500 people invited to undertake the survey, 2441 (97.6%) surveys were completed. The mean age of the participants was 40.4 ± 15.2 years and 51.6% (n=1260) were male. Socio-demographic profile of the participants is presented in Table 1.

For peer review only

**Table 1.** Profile of socio-demographic characteristics of survey participants

| Categories   | Total sample<br>n (%) | People without<br>psychosocial<br>disability<br>n (%) | People with<br>psychosocial<br>disability<br>n (%) |
|--------------|-----------------------|-------------------------------------------------------|----------------------------------------------------|
| <b>Total</b> | 2441 (100)            | 2326 (95.2)                                           | 117 (4.8)                                          |

The prevalence of psycho-social disability according to the study definition was 4.8%. with the prevalence of other types of disability self-reported at less than 2%. Of note, the prevalence of psychological distress, with no functional impairment, was only 1.2% meaning 75% of participants with psycho-social disability also reported comorbid functional impairments such as difficulties with mobility or eye-sight. Table 2 represents a model for the prevalence of psycho-social disability, adjusting for age, gender, marital status, occupation, and education.

**Table 2:** Association between socio-demographic factors and psycho-social disability

|                              |                                                                               |                              |                            |                    |
|------------------------------|-------------------------------------------------------------------------------|------------------------------|----------------------------|--------------------|
| <b>Age</b>                   | 18-24 years                                                                   | 410 (16.8)                   | 397 (17.1)                 | 13 (11.0)          |
|                              | 25-34 years                                                                   | 544 (22.3)                   | 522 (22.5)                 | 22 (18.6)          |
|                              | 35-44 years                                                                   | 586 (24.0)                   | 565 (24.3)                 | 21 (17.8)          |
|                              | 45-54 years                                                                   | 396 (16.2)                   | 381 (16.4)                 | 15 (12.7)          |
|                              | ≥ 55 years                                                                    | 505 (20.7)                   | 458 (19.7)                 | 46 (39.8)          |
| <b>Gender</b>                | Male                                                                          | 1,260 (51.6)                 | 1,196 (51.5)               | 64 (54.2)          |
|                              | Female                                                                        | 1,181 (48.4)                 | 1,127 (48.5)               | 53 (45.8)          |
| <b>Schooling</b>             | Yes                                                                           | 1,888 (77.4)                 | 1,828 (78.7)               | 60 (50.9)          |
|                              | No                                                                            | 553 (22.7)                   | 495 (21.3)                 | 57 (49.2)          |
| <b>Socio-economic status</b> | Poor                                                                          | 998 (40.9)                   | 933 (40.2)                 | 65 (55.1)          |
|                              | Middle                                                                        | 983 (40.3)                   | 939 (40.4)                 | 43 (37.3)          |
|                              | Rich                                                                          | 460 (18.8)                   | 451 (19.4)                 | 9 (7.6)            |
| <b>Marital status</b>        | Single                                                                        | 409 (16.8)                   | 389 (16.8)                 | 20 (17.0)          |
|                              | Married                                                                       | 1,866 (76.4)                 | 1,789 (77.0)               | 76 (65.3)          |
|                              | Separated/Divorced/<br>Widowed                                                | 166 (6.8)                    | 145 (6.2)                  | 21 (17.8)          |
| <b>Occupation</b>            | Employed                                                                      | 1,222 (52.2)                 | 1,175 (52.9)               | 47 (40.2)          |
|                              | Homemaker                                                                     | 834 (35.7)                   | 796 (35.8)                 | 38 (32.5)          |
|                              | None                                                                          | 283 (12.1)                   | 251 (11.3)                 | 32 (27.4)          |
| <b>Categories</b>            | <b>Prevalence of psychosocial disability using Kessler screening tool (%)</b> | <b>Unadjusted OR (95%CI)</b> | <b>Adjusted OR (95%CI)</b> |                    |
|                              |                                                                               | <i>n=117</i>                 | <i>n=117</i>               |                    |
|                              |                                                                               | <b>Sample n=2411</b>         |                            |                    |
| <b>Age</b>                   | 18-24 years                                                                   | 3.17 (1.7-5.36)              | -                          | -                  |
|                              | 25-34 years                                                                   | 4.04 (2.55-6.06)             | 1.3 (0.64-2.59)            | 2.93 (1.0-8.78)    |
|                              | 35-44 years                                                                   | 3.58 (2.22-5.43)             | 1.2 (0.56-2.29)            | 1.62 (0.31-8.41)   |
|                              | 45-54 years                                                                   | 3.79 (2.14-6.17)             | 1.2 (0.56-2.56)            | 1.41 (0.23-8.63)   |
|                              | ≥ 55 years                                                                    | 9.11 (6.75-11.96)            | 3.13 (1.66-5.91)           | 2.2 (0.59-8.22)    |
| <b>Gender</b>                | Female                                                                        | 4.49 (3.38-5.82)             |                            |                    |
|                              | Male                                                                          | 5.07 (3.93-5.44)             | 1.12 (0.77-1.62)           | 1.27 (0.72-2.21)   |
| <b>Schooling</b>             | Yes                                                                           | 3.18 (2.43-4.07)             |                            |                    |
|                              | No                                                                            | 10.31 (7.90-13.15)           | 3.6 (2.44-5.21)            | 2.3 (1.25-3.85)*   |
| <b>Marital status</b>        | Married                                                                       | 4.89(3.01-7.45)              |                            |                    |
|                              | Single                                                                        | 4.07(3.22-5.07)              | 0.81 (0.51-1.39)           | 0.43 (0.20-0.95)*  |
|                              | Separate/<br>widowed/<br>divorced                                             | 12.65 (8.0-18.68)            | 2.82 (1.47-5.39)           | 3.25 (0.56-8.96)   |
| <b>Occupation</b>            | Employed                                                                      | 3.84 (2.89-5.08)             |                            |                    |
|                              | Homemaker                                                                     | 4.43 (3.14-6.06)             | 1.19 (0.77-1.85)           | 1.07 (0.58-2.0)    |
|                              | Unemployed                                                                    | 11.31 (7.86-15.58)           | 3.19 (1.98-5.12)           | 2.90 (1.60-5.26)*  |
| <b>Socio-economic</b>        | Rich                                                                          | 1.96(0.9-3.68)               |                            |                    |
|                              | Middle                                                                        | 4.37 (3.18-5.85)             | 2.35 (1.13-4.86)           | 3.90 (1.57-9.67) * |

|                 |      |                  |                 |                    |
|-----------------|------|------------------|-----------------|--------------------|
| <b>c status</b> | Poor | 6.41 (5.06-8.22) | 3.49 (1.72-7.1) | 4.63 (1.88-11.43)* |
|-----------------|------|------------------|-----------------|--------------------|

An \* denotes a statistically significant association.

Table 2 demonstrates that the odds of having psycho-social disability were significantly higher in those with no schooling (2.3 times higher than those with schooling), unemployed people (2.9 times higher than those employed) and people in both the middle and poorer levels of socio-economic status (3.9 and 4.6 times high respectively than those of rich socio-economic status). Table 3 explores unmet need among people with and without psycho-social disability.

**Table 3.** Unmet need in those with psychosocial disability versus those without psycho-social disability (selected domains)

| Domain                             | Need<br>(In the last 6 months, to<br>what extent have you<br>been able to access...?) | People<br>with PSD<br>(n = 117) | %     | People<br>without<br>PSD<br>(n = 189) | %     | P-<br>Value |
|------------------------------------|---------------------------------------------------------------------------------------|---------------------------------|-------|---------------------------------------|-------|-------------|
| <b>Work</b>                        | MET NEED                                                                              | 43                              | 36.75 | 106                                   | 56.08 | <0.001      |
|                                    | UNMET NEED                                                                            | 45                              | 38.46 | 27                                    | 14.29 |             |
| <b>Health<br/>Services</b>         | MET NEED                                                                              | 66                              | 56.41 | 108                                   | 57.41 | <0.001      |
|                                    | UNMET NEED                                                                            | 33                              | 28.21 | 25                                    | 13.23 |             |
| <b>Community<br/>Consultations</b> | MET NEED                                                                              | 31                              | 25.5  | 95                                    | 50.26 | <0.001      |
|                                    | UNMET NEED                                                                            | 36                              | 30.77 | 28                                    | 14.81 |             |
| <b>Social<br/>Activities</b>       | MET NEED                                                                              | 52                              | 44.44 | 119                                   | 62.96 | <0.001      |
|                                    | UNMET NEED                                                                            | 28                              | 23.93 | 10                                    | 5.29  |             |
| <b>Sanitation</b>                  | MET NEED                                                                              | 100                             | 85.47 | 187                                   | 98.94 | <0.001      |
|                                    | UNMET NEED                                                                            | 17                              | 14.53 | 2                                     | 1.06  |             |
| <b>Safe Drinking<br/>Water</b>     | MET NEED                                                                              | 91                              | 77.78 | 176                                   | 93.12 | <0.001      |
|                                    | UNMET NEED                                                                            | 26                              | 22.22 | 13                                    | 6.88  |             |
| <b>Religion</b>                    | MET NEED                                                                              | 73                              | 62.39 | 139                                   | 73.54 | 0.001       |
|                                    | UNMET NEED                                                                            | 24                              | 20.51 | 12                                    | 6.35  |             |

*NB Domains measured but not listed above also addressed rehabilitation services, legal assistance, assistive devices and disaster management.*

In Table 3, across different access domains the unmet need was significantly higher in every domain for people with psycho-social disability, however when we removed the group who described that they did not want to participate, the difference between met and unmet need was not significant for Disabled Persons Organisations. More than a quarter of surveyed people with psycho-social disability described unmet need in relation to work (38%), health services (28%) and community consultation (30%). However, the unmet need was lower in some other domains as either the participants were not familiar with the service (e.g. nearly 80% of respondents did not know what a DPO was) or did not want to participate. Barriers faced in the different domains of daily life described above were assessed and are summarised in Table 4 below.

**Table 4.** Summary of barriers experienced to access domains of community services

| Barriers                                 | People with PSD<br>(n = 117) | Average % | People without PSD<br>(n = 189) | Average % | P- value |
|------------------------------------------|------------------------------|-----------|---------------------------------|-----------|----------|
| Lack of information                      | 54                           | 46.15     | 30                              | 15.87     | <0.0001* |
| Difficulty getting to services from home | 20                           | 17.09     | 14                              | 7.41      | 0.009*   |
| Physical inaccessibility                 | 24                           | 20.51     | 10                              | 5.29      | <0.0001* |
| Absence of reasonable accommodation      | 22                           | 18.80     | 16                              | 8.47      | 0.008*   |
| Cost                                     | 23                           | 19.66     | 16                              | 8.47      | 0.004*   |
| Absence of personal assistance to visit  | 79                           | 67.52     | 49                              | 25.93     | 0.03*    |
| Not available                            | 41                           | 35.04     | 56                              | 29.63     | 0.01*    |
| Negative attitudes                       | 59                           | 50.43     | 34                              | 17.99     | 0.01*    |
| Family has difficulty assisting access   | 26                           | 22.22     | 26                              | 13.76     | 0.15     |

People with psycho-social disability encountered greater barriers in every domain compared to matched controls and Table 4 shows that barriers related to lack of information, difficulty getting to services, physical inaccessibility of services, unavailability of services, lack of reasonable accommodation, lack of accompanying assistance accessing services and perceived negative attitudes were significantly higher for PPSD. Table 5 describes the types of barriers encountered under selected access domains. We present only the domains which demonstrated a consistent difference for people with and without psycho-social disability.

**Table 5.** Barriers faced by people with psycho-social disability vs those without (selected access domains)

| Barriers                                                                | People with<br>PSD<br>n = 117 | %     | People<br>without<br>PSD<br>n = 189 | %    | P-<br>value |
|-------------------------------------------------------------------------|-------------------------------|-------|-------------------------------------|------|-------------|
| <b>Place of work</b>                                                    |                               |       |                                     |      |             |
| Lack of information about work                                          | 12                            | 10.26 | 10                                  | 5.29 | 0.10        |
| Negative attitudes towards me at work                                   | 11                            | 9.4   | 4                                   | 2.1  | <0.001*     |
| Difficulty getting to work from home                                    | 17                            | 14.5  | 11                                  | 5.8  | 0.01*       |
| <b>Health</b>                                                           |                               |       |                                     |      |             |
| Lack of information about health services                               | 18                            | 15.4  | 12                                  | 6.4  | 0.01*       |
| Negative attitudes towards me                                           | 8                             | 6.8   | 4                                   | 2.1  | 0.04*       |
| Difficulty getting to health services                                   | 13                            | 11.1  | 8                                   | 4.2  | 0.02*       |
| <b>Community Consultations</b>                                          |                               |       |                                     |      |             |
| Lack of information about community consultations                       | 14                            | 12.0  | 18                                  | 9.5  | 0.50        |
| Negative attitudes towards me                                           | 12                            | 10.3  | 2                                   | 1.1  | <0.001*     |
| Difficulty getting to community meetings from home                      | 16                            | 13.7  | 7                                   | 3.7  | <0.001*     |
| <b>Rehabilitation Services</b>                                          |                               |       |                                     |      |             |
| Lack of information about rehabilitation services                       | 19                            | 16.2  | 12                                  | 6.4  | 0.01*       |
| Negative attitudes towards you from rehab services                      | 4                             | 3.4   | 0                                   | 0    | 0.01*       |
| Difficulty getting to rehabilitation services from home                 | 9                             | 7.7   | 8                                   | 4.2  | 0.20        |
| <b>Safe drinking water</b>                                              |                               |       |                                     |      |             |
| Lack of information about accessible safe water                         | 5                             | 4.3   | 1                                   | 0.5  | 0.02*       |
| Negative attitudes towards me                                           | 6                             | 5.1   | 1                                   | 0.5  | 0.01*       |
| Difficulty getting to safe water supplies (e.g. pumps, wells) from home | 8                             | 6.8   | 3                                   | 1.6  | 0.02*       |
| <b>Social Activities</b>                                                |                               |       |                                     |      |             |
| Lack of information about social activities                             | 5                             | 4.3   | 3                                   | 1.6  | 0.15        |
| Negative attitudes towards me                                           | 5                             | 4.3   | 2                                   | 1.1  | 0.07        |
| Difficulty getting to social venues from home                           | 13                            | 11.1  | 1                                   | 0.5  | <0.001*     |
| <b>Religion</b>                                                         |                               |       |                                     |      |             |
| Lack of information about religious activities                          | 5                             | 4.3   | 3                                   | 1.6  | 0.15        |
| Negative attitudes towards me                                           | 5                             | 4.3   | 2                                   | 1.1  | 0.07        |
| Difficulty getting to religious venues from home                        | 11                            | 9.4   | 3                                   | 1.6  | <0.001*     |
| <b>Government Social Welfare Services</b>                               |                               |       |                                     |      |             |
| Lack of information about Government social services                    | 12                            | 10.3  | 6                                   | 3.2  | 0.01**      |
| Negative attitudes towards me                                           | 9                             | 7.7   | 0                                   | 0.00 | <0.001*     |
| Difficulty getting to social welfare services                           | 5                             | 4.3   | 1                                   | 0.5  | 0.02*       |
| <b>Disabled Persons' Organisations</b>                                  |                               |       |                                     |      |             |
| Lack of information about DPO services <sup>1</sup>                     | 11                            | 9.4   | 3                                   | 1.6  | <0.001*     |
| Negative attitudes towards me                                           | 1                             | 0.9   | 1                                   | 0.5  | 0.73        |
| Difficulty getting to DPO venue from home                               | 5                             | 4.3   | 3                                   | 1.6  | 0.152       |
| <b>Education</b>                                                        |                               |       |                                     |      |             |
| Lack of information about education or training                         | 14                            | 12.0  | 11                                  | 5.82 | 0.06        |

<sup>1</sup> Other aspects of the DPO domain had too few numbers for useful analysis

|                                                        |   |     |   |      |       |
|--------------------------------------------------------|---|-----|---|------|-------|
| Negative attitudes towards you                         | 4 | 3.4 | 1 | 0.53 | 0.05  |
| Difficulty getting to education or training facilities | 7 | 6.0 | 2 | 1.06 | 0.01* |

Lack of information about services as a barrier to access was significantly higher for people with psycho-social disability compared to matched controls in the domains of health services, rehabilitation services, safe drinking water, Government social services and DPOs i.e. in half of the domains described. 'Negative attitudes towards you' was identified as a significant barrier to services for PPSD compared to controls in 6 of the 10 services described above. There was also a significant difference in negative attitudes perceived by people with psycho-social disability compared to controls in over half of the domains i.e. in domains of workplace, health, community consultations, rehabilitation services, safe drinking water and Government social welfare services. Surprisingly perhaps, physical accessibility was also a barrier that was significantly greater for people with psycho-social disability compared to controls (described in eight of ten domains).

## DISCUSSION

This cross-sectional survey in Sahaspur Block of Dehradun district revealed a prevalence of psycho-social disability of 4.8%, considerably higher than 0.06% prevalence rate for psychosocial disability described in the 2011 census in Uttarakhand<sup>21</sup>. The broad definition of PSD used in this survey as well as the use of non-stigmatising language is likely to have led to a higher number of people identified and may explain part of this difference in prevalence<sup>15</sup>. The prevalence identified in this study aligns with the prevalence of mental illness in India ranging from 3.4% to 8.9% described in meta-analytic studies, using a range of tools and definitions<sup>22 23</sup> and also aligns fairly closely with a recent cross-sectional population survey conducted in the district of Dehradun conducted by the same lead author, that described the prevalence of depression as 6.0%, using a depression screening tool<sup>16</sup>.

This study finds risks of psycho-social disability are two to four times higher among people who have low education, unemployment and middle or low socio-economic status. Given that three-quarters of those who identified themselves as having psycho-social disability also described a co-morbid functional impairment it seems likely that functional impairment itself may increase mental distress. This significant contribution of social determinants of health was also found in the cross-sectional study of depression described above where the risk of depression was two to four times higher among people with limited schooling, poor housing, indebtedness and membership of oppressed castes<sup>16</sup>. The mechanisms by which social health determinants lead to increased psycho-social disability are likely to be complex with multiple mediating factors<sup>10</sup>. In this study, we cannot determine the direction of causation however a systematic review that assessed links between common mental disorders and poverty similarly found strong relationships between education, housing, socio-economic status and common mental disorders, a finding supported by other key publications on social determinants of mental health.<sup>9 24</sup> Figure 1 shows a possible model for the two-way interaction of poverty and common psycho-social disability in a vicious cycle. We propose that with a social model of disability, disability itself, and other functional limitations can be located under the title of 'social causation'.

1  
2  
3  
4 **Figure 1.** Diagram developed by Crick et al, proposing a two-way interaction between poverty and  
5 mental ill-health<sup>10</sup>  
6

7  
8 The high rate of co-morbid functional impairment reported in this study suggests a high rate of other  
9 forms of disability mixed with psycho-social disability although this cross-sectional study cannot  
10 ascertain directionality and causation (it is likely that those with functional impairment are also at  
11 higher risk of psycho-social distress). This finding is supported by this study's assessment of barriers  
12 to community services where there is a high rate of reporting of physical barriers to services and in  
13 particular, identification of the lack of physical access/ transport difficulties for people with psycho-  
14 social disability. It clearly points to the need for policies and programmes to promote mental health  
15 knowledge and skills for all people with disabilities. Additionally, mental health policies and  
16 programmes must ensure inclusion of all people with disabilities, and seek to reduce the multiple  
17 types of barriers that limit access to care and community participation.  
18  
19

20 This study presents one of the first accounts of barriers experienced by people with psycho-social  
21 disability for access to services in India. While the total percentage numbers of PPSD who identify  
22 barriers to access community services are lower than expected, it is notable that PPSD are  
23 significantly more likely to describe barriers in multiple domains of life, when compared to matched  
24 controls. While the UNCRPD makes it clear that disability is influenced by both medical limitations  
25 and social prejudice, the ways that this plays out for people who suffer from psycho-social disability  
26 to limit their community participation is rarely assessed. The three key barriers to participation most  
27 frequently identified by participants with psycho-social disability in this study are related to attitudes  
28 (negative attitudes towards me), practices (lack of accommodation to support access to services)  
29 and structures (e.g. making it difficult to get to services), which are similar to findings in a study  
30 examining participation of people with psycho-social disability in mental health policy development  
31 in South Africa<sup>2</sup>. Our study shows that people with psycho-social disability describe stigma (negative  
32 attitudes) as a significant barrier in nearly half of the domains of services described here. A number  
33 of papers have described experiences of stigma of people with psycho-social disability in India and  
34 in particular how this can negatively impact access to mental health services<sup>25-27</sup> however this study is  
35 likely the first paper to demonstrate how perceived negative attitude interact with domains of  
36 community services and participation. Reasons why negative attitudes were not identified as limiting  
37 access to some community services is not clear and this is an area that requires further research.  
38 The impact of multiple marginalities such as membership of an excluded social group or having  
39 female gender and low education status adding to the disadvantage of disability has been identified  
40 as a basis for additional exclusion of those with PSD<sup>28 29</sup>.  
41  
42  
43  
44  
45

46 In the multiple domains assessed in this study lack of information and physical accessibility were also  
47 frequently perceived as barriers to participation by people with psycho-social disability. The  
48 contribution of co-existing functional impairment is likely to explain the barriers related to physical  
49 accessibility and transport. While lack of access to information is high (34%) in the general  
50 community, it is even higher for people with PSD (50%). Possible reasons why lack of information  
51 appears to be a greater barrier for people with psycho-social disability could be that this group has  
52 lower literacy and fewer social contacts and networks (so less information comes their way), and  
53 that they are less motivated in seeking out information. Perhaps this group also has reduced access  
54 to mass media such as television or radio.  
55  
56  
57



1  
2  
3 There are ample policies and legal structures to promote access and participation for people with  
4 disabilities in India including those with PSD. India was one of the first countries to sign the UNCRPD  
5 and recently passed the Mental Health Care Act (2017) both documents of which include  
6 components to support participation and access to services. The new Rights of Persons with  
7 disabilities act (2016) clearly includes people with mental illness, and builds on the Persons with  
8 disabilities act (1995) to push for a more disabled inclusive and accessible environment<sup>30</sup>. At the  
9 same time, we join with others to observe that access to services and participation for people with  
10 PSD remains limited, and implementation and regulation are very weak links in the chain in relation  
11 to health services and policies in India<sup>30 31</sup>.  
12  
13

14 Programmatic implementation at all levels must intentionally seek to include people with psycho-  
15 social disability. This demands attention to increasing the accessibility of community level structures  
16 such as transport and dissemination of information related to services and entitlements so that they  
17 reach people with psycho-social disability. This will require using mediums that are accessible to  
18 those who have low literacy and who have limited social networks such as loudspeaker  
19 announcements which are used widely and effectively by campaigning political parties in India. It  
20 also requires changes in attitudes at all levels in the community and among service providers. A  
21 number of steps can be taken to reduce stigma and increase social inclusion in programmes related  
22 to health, education and sanitation which include increasing awareness in the community, educating  
23 service providers and increasing direct contact between people with psycho-social disability and  
24 others<sup>32</sup>.  
25  
26  
27

28 A further clear message from this study is that since risk and protective factors for mental health act  
29 at several different levels, and include macro-economic health determinants, responses to them  
30 need to be multi-layered and multi-sectoral. Macro-policies that address poverty, education,  
31 welfare, transport, housing and employment sectors are required, with a 'health in all policies'  
32 approach<sup>9</sup>.and seems likely to also reduce the disease burden related to psycho-social disability<sup>33</sup>.  
33  
34

### 35 **Methodological considerations**

36 The Kessler tool is a screening rather than diagnostic tool, and excluded two key risk factors for  
37 psycho-social disability: stressful life events and chronic illness. While the Kessler-6 scale has been  
38 found to have moderate- to- high discriminating ability when used by lay workers in identifying  
39 common mental disorders in India<sup>34 35</sup>, it did not screen for the whole spectrum of psychosocial  
40 disability. A limitation of the findings presented in Table 3 and 5 particularly is that the numbers are  
41 small reducing the reliability of the findings and meaning that some findings that may well have  
42 been significant with a larger sample, were not elucidated. The study is limited to adults of over 18  
43 years of age, and so cannot assess the prevalence of psycho-social disability or barriers they face,  
44 among children. As the RAD survey tool used self-reported data there may be a risk of social  
45 desirability or recall bias. As a cross-sectional survey, it cannot attribute causality to apparent risk  
46 factors. A major strength of this study is that its data are from a randomly selected population  
47 covering rural, semi-urban and urban populations in North India which increases the generalisability  
48 of the findings, and suggests they may be applicable to other urban and rural settings in North India.  
49 Multivariable analysis ensured that potentially confounding factors were considered.  
50  
51  
52  
53  
54  
55  
56  
57  
58  
59  
60

## CONCLUSIONS

Psycho-social disability in Dehradun district, Uttarakhand, with a prevalence of at least 4.8% is two or three times more common among people with co-morbid functional impairment who are economically deprived, who have had little education and who are unemployed. People with psycho-social disability face significant unmet needs related to community services and perceive negative social attitudes as a significant barrier limiting their participation in multiple domains. Social policy and programmes in India must take active steps to address social determinants of psycho-social disability such as increasing access to education and reduce economic deprivation. Additionally, action is needed at all levels of community programmes and services to increase social inclusion of people with psycho-social disability.

## ACKNOWLEDGEMENTS

The authors would like to thank CBM for the funding support, their responsiveness and helpful engagement throughout the duration of the entire RAD project. With CBM's sponsorship, the Public Health Foundation of India and the Nossal Institute for Global health of the University of Melbourne became partners in conducting this research. We acknowledge the support of field research teams under the CHGN Uttarakhand Cluster for their support in data collection. The teams were AKS HOPE, OPEN, Chamba Christian hospital and EHA (Samvedna and Anugrah projects). The authors declare they have no competing interests in publishing this paper.

## REFERENCES

1. Drew N, Funk M, Tang S, et al. Human rights violations of people with mental and psychosocial disabilities: an unresolved global crisis. *Lancet* 2011;378(9803):1664-75. doi: 10.1016/s0140-6736(11)61458-x [published Online First: 2011/10/20]
2. Kleintjes S, Lund C, Swartz L. Barriers to the participation of people with psychosocial disability in mental health policy development in South Africa: a qualitative study of perspectives of policy makers, professionals, religious leaders and academics. *BMC Int Health Hum Rights* 2013;13:17. doi: 10.1186/1472-698x-13-17 [published Online First: 2013/03/19]
3. Braithwaite J, Mont D. Disability and poverty: A survey of World Bank Poverty Assessments and implications. *ALTER - European Journal of Disability Research / Revue Européenne de Recherche sur le Handicap* 2009;3(3):219-32. doi: <https://doi.org/10.1016/j.alter.2008.10.002>
4. United Nations. United Nations Conventions on the Rights of Persons with Disabilities. Geneva, 2008.
5. Link B, Phelan J. Conceptualizing stigma. *Annu Rev Sociol* 2001;27:363 - 85.
6. Popay J, Escorel S, Hernandez M, et al. Understanding and tackling social exclusion - Final Report to the WHO Commission on Social Determinants of Health WHO Social Exclusion Knowledge Network. Geneva: World Health Organisation, 2008.
7. Baumgartner J, Burns J. Measuring social inclusion—a key outcome in global mental health. *Int J Epidemiol* 2014;43(2):354-64. doi: 10.1093/ije/dyt224
8. Collins P, Patel V, Joestl S. Grand challenges in Global mental health. *Nature* 2011;475:27-30.
9. Organization WH. Social determinants of mental health: World Health Organization 2014.
10. Lund C, Breen A, Flisher AJ, et al. Poverty and common mental disorders in low and middle income countries: A systematic review. *Soc Sci Med* 2010;71(3):517-28. doi: 10.1016/j.socscimed.2010.04.027 [published Online First: 2010/07/14]
11. Campbell C, Jovchelovitch S. Health, Community and Development : toward a social psychology of participation. *Journal of Community and Applied Social Psychology* 2007;10:255-70.
12. Bandura A. Self efficacy in changing societies. Cambridge: Cambridge University Press 1996.
13. Baum F, Palmer C. 'Opportunity structures': urban landscape, social capital and health promotion in Australia. *Health Promotion International* 2002;17(4):351-61.
14. Mathias K, Kermode K, San Sebastian M, et al. Under the banyan tree - exclusion and inclusion of people with mental distress in rural North India. *BMC Public Health* 2015;15(446) doi: 10.1186/s12889-015-1778-2
15. Grills N, Singh L, Pant H, et al. Inferior access to services and greater barriers faced by people with disabilities compared to those without disability: a quantitative survey using Rapid Assessment of Disability tool. . *Disability, CBR & Inclusive Development Journal* 2017;(in press - September 2017)
16. Mathias K, Goicolea I, Kermode M, et al. Cross-sectional study of depression and help-seeking in Uttarakhand, North India. *BMJ Open* 2015;5(11) doi: 10.1136/bmjopen-2015-008992
17. Marella M, Busijia L, Islam A, et al. Field-testing of the rapid assessment of disability questionnaire. *BMC Public Health* 2014;14(1) doi: 10.1186/1471-2458-14-900
18. Kessler RC, Barker PR, Colpe LJ, et al. Screening for serious mental illness in the general population. *Arch Gen Psychiatry* 2003;60(2):184-89.
19. Kessler RC, Andrews G, Colpe LJ, et al. Short screening scales to monitor population prevalences and trends in non-specific psychological distress. *Psychol Med* 2002;32(06):959-76.
20. LP SC. Stata statistical software. College Station: StataCorpLP, 2015.
21. Government of India. Census 2011 2011 [Available from: <http://www.census2011.co.in/census> accessed 29 September 2014.

- 1  
2  
3 22. Ganguli H. Epidemiological findings on prevalence of mental disorders in India. *Indian J Psychiatr*  
4 2000;42(1):14-20.
- 5 23. Reddy VM, Chandrashekar C. Prevalence of mental and behavioural disorders in India: A meta-  
6 analysis. *Indian J Psychiatry* 1998;40(2):149.
- 7 24. World Health Organisation. Risks to mental health : an overview of vulnerabilities and risk  
8 factors. In: WHO Secretariat for the development of a comprehensive mental health action  
9 plan, ed. Geneva: WHO, 2012.
- 10 25. Koschorke M, Padmavati R, Kumar S, et al. Experiences of stigma and discrimination of people  
11 with schizophrenia in India. *Soc Sci Med* 2014;123:149-59. doi:  
12 <https://doi.org/10.1016/j.socscimed.2014.10.035>
- 13 26. Raguram R, Raghu TM, Vounatsou P, et al. Schizophrenia and the cultural epidemiology of stigma  
14 in Bangalore, India. *J Nerv Ment Dis* 2004;192(11):734-44.
- 15 27. Venkatesh BT, Andrews T, Mayya SS, et al. Perception of stigma toward mental illness in South  
16 India. *Journal of family medicine and primary care* 2015;4(3):449-53. doi: 10.4103/2249-  
17 4863.161352 [published Online First: 2015/08/20]
- 18 28. Mehrotra N. Disability, Gender and Caste: Marginality, Exclusion and Opportunities in Indian  
19 Economy. *Women's Link* 2012;18(2):5-8.
- 20 29. Mehrotra N. Negotiating gender and disability in rural Haryana. *Sociological bulletin* 2006:406-  
21 26.
- 22 30. Mehrotra N. Disability rights movements in India: Politics and practice. *Economic & Political*  
23 *Weekly* 2011;46(6):65-72.
- 24 31. Addlakha R, Mandal S. Disability Law in India: Paradigm Shift or Evolving Discourse? *Economic*  
25 *and Political Weekly* 2009:62-68.
- 26 32. Collins R, Wong E, Cerully J. Interventions to reduce mental health stigma and discrimination - a  
27 literature review to guide evaluation of California's mental health prevention and early  
28 intervention initiative. Los Angeles: California Mental Health Services Authority, 2012.
- 29 33. Lund C, De Silva M, Plagerson S, et al. Poverty and mental disorders: breaking the cycle in low-  
30 income and middle-income countries. *Lancet* 2011;378(9801):1502-14. doi: 10.1016/s0140-  
31 6736(11)60754-x [published Online First: 2011/10/20]
- 32 34. Chowdhary N, Patel V. Detection of common mental disorder and alcohol use disorders in HIV  
33 infected people: A validation study in Goa, India. *Asian J Psychiatr* 2010;3(3):130-33. doi:  
34 <http://dx.doi.org/10.1016/j.ajp.2010.08.002>
- 35 35. Patel V, Araya R, Chowdhary N, et al. Detecting common mental disorders in primary care in  
36 India: a comparison of five screening questionnaires. *Psychol Med* 2008;38(2):221-8. doi:  
37 10.1017/s0033291707002334 [published Online First: 2007/12/01]  
38  
39  
40  
41  
42  
43  
44  
45  
46  
47  
48  
49  
50  
51  
52  
53  
54  
55  
56  
57  
58  
59  
60

1  
2  
3  
4  
5  
6  
7  
8  
9  
10  
11  
12  
13  
14  
15  
16  
17  
18  
19  
20  
21  
22  
23  
24  
25  
26  
27  
28  
29  
30  
31  
32  
33  
34  
35  
36  
37  
38  
39  
40  
41  
42  
43  
44  
45  
46  
47  
48  
49  
50  
51  
52  
53  
54  
55  
56  
57  
58  
59  
60



310x223mm (300 x 300 DPI)

ew only

**STROBE 2007 (v4) checklist of items to be included in reports of observational studies in epidemiology\***  
**Checklist for cohort, case-control, and cross-sectional studies (combined)**

| Section/Topic             | Item # | Recommendation                                                                                                                                                                                                                                                                                                                                                                                                                                                         | Reported on page #                                                                                    |
|---------------------------|--------|------------------------------------------------------------------------------------------------------------------------------------------------------------------------------------------------------------------------------------------------------------------------------------------------------------------------------------------------------------------------------------------------------------------------------------------------------------------------|-------------------------------------------------------------------------------------------------------|
| Title and abstract        | 1      | (a) Indicate the study's design with a commonly used term in the title or the abstract                                                                                                                                                                                                                                                                                                                                                                                 | Y – p 1                                                                                               |
|                           |        | (b) Provide in the abstract an informative and balanced summary of what was done and what was found                                                                                                                                                                                                                                                                                                                                                                    | Y – p 1 and 2                                                                                         |
| <b>Introduction</b>       |        |                                                                                                                                                                                                                                                                                                                                                                                                                                                                        |                                                                                                       |
| Background/rationale      | 2      | Explain the scientific background and rationale for the investigation being reported                                                                                                                                                                                                                                                                                                                                                                                   | Y – p 4 and 5                                                                                         |
| Objectives                | 3      | State specific objectives, including any pre-specified hypotheses                                                                                                                                                                                                                                                                                                                                                                                                      | Y – top of p 5 aim of study is outlined                                                               |
| <b>Methods</b>            |        |                                                                                                                                                                                                                                                                                                                                                                                                                                                                        |                                                                                                       |
| Study design              | 4      | Present key elements of study design early in the paper                                                                                                                                                                                                                                                                                                                                                                                                                | Y – in second paragraph of methods in p 5                                                             |
| Setting                   | 5      | Describe the setting, locations, and relevant dates, including periods of recruitment, exposure, follow-up, and data collection                                                                                                                                                                                                                                                                                                                                        | Y – all of these are covered on p 5 and 6 in Methods section                                          |
| Participants              | 6      | (a) <i>Cohort study</i> —Give the eligibility criteria, and the sources and methods of selection of participants. Describe methods of follow-up<br><i>Case-control study</i> —Give the eligibility criteria, and the sources and methods of case ascertainment and control selection. Give the rationale for the choice of cases and controls<br><i>Cross-sectional study</i> —Give the eligibility criteria, and the sources and methods of selection of participants | Cross sectional – eligibility sources and methods – Y on p 5, 6                                       |
|                           |        | (b) <i>Cohort study</i> —For matched studies, give matching criteria and number of exposed and unexposed<br><i>Case-control study</i> —For matched studies, give matching criteria and the number of controls per case                                                                                                                                                                                                                                                 |                                                                                                       |
| Variables                 | 7      | Clearly define all outcomes, exposures, predictors, potential confounders, and effect modifiers. Give diagnostic criteria, if applicable                                                                                                                                                                                                                                                                                                                               | Y – described within description of survey tool, p 5 last paragraph and top of p6                     |
| Data sources/ measurement | 8*     | For each variable of interest, give sources of data and details of methods of assessment (measurement). Describe comparability of assessment methods if there is more than one group                                                                                                                                                                                                                                                                                   | Y – these are covered in description of the data collection tool in methods pages 5 and 6             |
| Bias                      | 9      | Describe any efforts to address potential sources of bias                                                                                                                                                                                                                                                                                                                                                                                                              | Y – methods in bottom of p 5 and 6 describe two-stage process for random selection of participants to |

|                        |     |                                                                                                                                                                                                                                                                                                           |                                                                                                                                                         |
|------------------------|-----|-----------------------------------------------------------------------------------------------------------------------------------------------------------------------------------------------------------------------------------------------------------------------------------------------------------|---------------------------------------------------------------------------------------------------------------------------------------------------------|
|                        |     |                                                                                                                                                                                                                                                                                                           | reduce bias                                                                                                                                             |
| Study size             | 10  | Explain how the study size was arrived at                                                                                                                                                                                                                                                                 | Y – p 5 – the linked study which has been published and was uploaded with this submission, describes the power calculation used to establish study size |
| Quantitative variables | 11  | Explain how quantitative variables were handled in the analyses. If applicable, describe which groupings were chosen and why                                                                                                                                                                              | Y – the analysis used including how people with psychosocial disability were identified, and process for multi-variate regression is described in p 6   |
| Statistical methods    | 12  | (a) Describe all statistical methods, including those used to control for confounding                                                                                                                                                                                                                     | Y - process for multi-variate regression is described in p 6                                                                                            |
|                        |     | (b) Describe any methods used to examine subgroups and interactions                                                                                                                                                                                                                                       | Y – analysis with PPSD compared to those without PSD is described in results and methods p 6                                                            |
|                        |     | (c) Explain how missing data were addressed                                                                                                                                                                                                                                                               | NA – there was not an issue of missing data                                                                                                             |
|                        |     | (d) <i>Cohort study</i> —If applicable, explain how loss to follow-up was addressed<br><i>Case-control study</i> —If applicable, explain how matching of cases and controls was addressed<br><i>Cross-sectional study</i> —If applicable, describe analytical methods taking account of sampling strategy | Y – the analysis process used described in p 6                                                                                                          |
|                        |     | (e) Describe any sensitivity analyses                                                                                                                                                                                                                                                                     | NA                                                                                                                                                      |
| <b>Results</b>         |     |                                                                                                                                                                                                                                                                                                           |                                                                                                                                                         |
| Participants           | 13* | (a) Report numbers of individuals at each stage of study—eg numbers potentially eligible, examined for eligibility, confirmed eligible, included in the study, completing follow-up, and analysed                                                                                                         | Y – the sampling process is described in p5 and Table 1 provides a summary of participants                                                              |
|                        |     | (b) Give reasons for non-participation at each stage                                                                                                                                                                                                                                                      | NA                                                                                                                                                      |
|                        |     | (c) Consider use of a flow diagram                                                                                                                                                                                                                                                                        | Y – we considered but didn't believe it was required as once enrolled in the study, we did not lost participants.                                       |
| Descriptive data       | 14* | (a) Give characteristics of study participants (eg demographic, clinical, social) and information on                                                                                                                                                                                                      | Y – these are provided in Table 1 on                                                                                                                    |



|                          |     |                                                                                                                                                                                                              |                                                                                                                                                |
|--------------------------|-----|--------------------------------------------------------------------------------------------------------------------------------------------------------------------------------------------------------------|------------------------------------------------------------------------------------------------------------------------------------------------|
|                          |     | exposures and potential confounders                                                                                                                                                                          | p 8                                                                                                                                            |
|                          |     | (b) Indicate number of participants with missing data for each variable of interest                                                                                                                          | NA – data was complete                                                                                                                         |
|                          |     | (c) <i>Cohort study</i> —Summarise follow-up time (eg, average and total amount)                                                                                                                             |                                                                                                                                                |
| Outcome data             | 15* | <i>Cohort study</i> —Report numbers of outcome events or summary measures over time                                                                                                                          |                                                                                                                                                |
|                          |     | <i>Case-control study</i> —Report numbers in each exposure category, or summary measures of exposure                                                                                                         |                                                                                                                                                |
|                          |     | <i>Cross-sectional study</i> —Report numbers of outcome events or summary measures                                                                                                                           | Y – these are reported in Tables 2 – 5 on pages 8 - 11                                                                                         |
| Main results             | 16  | (a) Give unadjusted estimates and, if applicable, confounder-adjusted estimates and their precision (eg, 95% confidence interval). Make clear which confounders were adjusted for and why they were included | Y – Table 2 provides crude and adjusted OR on p 8, and the confidence intervals – which variables included and why is described in Methods p 6 |
|                          |     | (b) Report category boundaries when continuous variables were categorized                                                                                                                                    | Y – for example age groups in Table 1 p 8                                                                                                      |
|                          |     | (c) If relevant, consider translating estimates of relative risk into absolute risk for a meaningful time period                                                                                             | NA                                                                                                                                             |
| Other analyses           | 17  | Report other analyses done—eg analyses of subgroups and interactions, and sensitivity analyses                                                                                                               | NZ                                                                                                                                             |
| <b>Discussion</b>        |     |                                                                                                                                                                                                              |                                                                                                                                                |
| Key results              | 18  | Summarise key results with reference to study objectives                                                                                                                                                     | Y – these are summarised in para 2 of Discussion p 12                                                                                          |
| Limitations              | 19  | Discuss limitations of the study, taking into account sources of potential bias or imprecision. Discuss both direction and magnitude of any potential bias                                                   | Y - discussed under methodological limitations p 14                                                                                            |
| Interpretation           | 20  | Give a cautious overall interpretation of results considering objectives, limitations, multiplicity of analyses, results from similar studies, and other relevant evidence                                   | Y – these are discussed on p 12-14                                                                                                             |
| Generalisability         | 21  | Discuss the generalisability (external validity) of the study results                                                                                                                                        | Y – see in Method considerations p 14                                                                                                          |
| <b>Other information</b> |     |                                                                                                                                                                                                              |                                                                                                                                                |
| Funding                  | 22  | Give the source of funding and the role of the funders for the present study and, if applicable, for the original study on which the present article is based                                                | Y – funders are discussed in acknowledgements section p 15                                                                                     |

\*Give information separately for cases and controls in case-control studies and, if applicable, for exposed and unexposed groups in cohort and cross-sectional studies.



1  
2  
3  
4  
5  
6  
7  
8  
9  
10  
11  
12  
13  
14  
15  
16  
17  
18  
19  
20  
21  
22  
23  
24  
25  
26  
27  
28  
29  
30  
31  
32  
33  
34  
35  
36  
37  
38  
39  
40  
41  
42  
43  
44  
45  
46  
47

**Note:** An Explanation and Elaboration article discusses each checklist item and gives methodological background and published examples of transparent reporting. The STROBE checklist is best used in conjunction with this article (freely available on the Web sites of PLoS Medicine at <http://www.plosmedicine.org/>, Annals of Internal Medicine at <http://www.annals.org/>, and Epidemiology at <http://www.epidem.com/>). Information on the STROBE Initiative is available at [www.strobe-statement.org](http://www.strobe-statement.org).

For peer review only
